# Supplementary material for: A double-helical S,C-bridged tetraphenyl-para-phenylenediamine and its persistent radical cation
Source: Royal Society of Chemistry journal article supplement (doi:10.1039/d2cc06144a), 2022-12-31
Supplement: d2cc06144a1.pdf [file d2cc06144a1.pdf]

*Electronic supplementary information*

## **A double-helical S,C-bridged tetraphenyl-*para*-phenylenediamine and its persistent radical cation**

Kaho Harada,<sup>a</sup> Chika Hasegawa,<sup>b</sup> Taisuke Matsumoto,<sup>c</sup> Hiroki Sugishita,<sup>a</sup> Chitoshi Kitamura,<sup>a</sup>  
Shuhei Higashibayashi,<sup>d</sup> Masashi Hasegawa,<sup>b</sup> Shuichi Suzuki,<sup>e</sup> Shin-ichiro Kato\*<sup>a</sup>

<sup>a</sup> *Department of Materials Science, School of Engineering, The University of Shiga Prefecture, 2500 Hassaka-cho, Hikone, Shiga 522-8533, Japan*

<sup>b</sup> *Department of Chemistry, School of Science, Kitasato University, 1-15-1 Kitasato, Minami-ku, Sagami-hara, Kanagawa 252-0373, Japan*

<sup>c</sup> *Institute for Materials Chemistry and Engineering (IMCE), Kyushu University, 6-1, Kasuga-koh-en, Kasuga, Fukuoka 816-8580, Japan.*

<sup>d</sup> *Faculty of Pharmacy, Keio University, 1-5-30, Shibakoen, Minato-ku, Tokyo 105-8512, Japan*

<sup>e</sup> *Department of Chemistry, Graduate School of Engineering Science, Osaka University, 1-3 Machikaneyama-cho, Toyonaka, Osaka 560-8531, Japan*

### **Table of contents**

1. Experimental details: synthesis of compounds (S2)
2. X-ray crystallographic data (S5)
3. Supporting figures, scheme, and tables (S6)
4. <sup>1</sup>H and <sup>13</sup>C NMR spectral data (S26)
5. Tables of cartesian coordinates of molecules (S30)
6. References (S41)
7. Author contributions (S42)

## 1. Experimental details: synthesis of compounds

**General procedures.** All air-sensitive manipulations were carried out under inert nitrogen gas. An oil bath was used as the heat source. Column chromatography was carried out using SiO<sub>2</sub> or alumina. Thin-layer chromatography (TLC) was conducted on aluminum sheets coated with SiO<sub>2</sub> 60 F<sub>254</sub>. Melting points (M.p.) were measured with a capillary tube (Stanford Research Systems OPTiMelt MPA100). <sup>1</sup>H and <sup>13</sup>C NMR spectra were recorded on a spectrometer (JEOL JNM-ECS400) at 400 MHz for <sup>1</sup>H and 100 MHz for <sup>13</sup>C. CDCl<sub>3</sub> and *p*-xylene-*d*<sub>10</sub> were used as a solvent, and residual solvent signal in the <sup>1</sup>H and <sup>13</sup>C NMR spectra was used as an internal reference. To avoid the effect of DCI<sub>3</sub> on the spectral broadening, Et<sub>3</sub>N was included in CDCl<sub>3</sub>. HRMS (Thermo Fisher Scientific LTQ Orbitrap XL) spectrometric analyses were conducted in a positive or negative mode. Electronic absorption (JASCO V-670 or JV-550) spectra were measured in a cuvette of 1 cm at room temperature. Cyclic voltammetry (EC Frontier ECstat-100) was performed using a cell equipped with a platinum wire working electrode, a platinum wire counter electrode, and an Ag/AgNO<sub>3</sub> reference electrode. All electrochemical measurements were performed in CH<sub>2</sub>Cl<sub>2</sub> solution (ca. 0.5 mmol L<sup>-1</sup>) containing 0.1 mol L<sup>-1</sup> [(*n*-Bu)<sub>4</sub>N][PF<sub>6</sub>] at room temperature. All potentials are referenced to the ferrocenium/ferrocene (Fc<sup>+</sup>/Fc) couple, which was used as a standard. EPR spectra were recorded with a JEOL JES-FE2XG spectrometer. The solutions of samples were placed in EPR tubes and degassed via the freeze–pump–thaw method, before the EPR tubes were sealed. The EPR measurements were performed using ca. 0.1 mmol L<sup>-1</sup> solutions at room temperature. EPR spectral simulations were conducted using the Bruker program *Simfonia*. Elemental analyses were performed at A Rabbit Science Japan Co., Ltd. Quantum chemical calculations were performed by Gaussian 09 package of ab initio MO calculations.<sup>[1]</sup>

### Preparation of double-helical S,C-bridged tetraphenyl-*para*-phenylenedicamine **4**

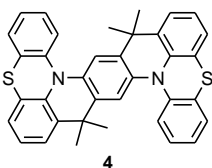

Diol **7** (1.54 g, 2.54 mmol) was dissolved with hot CH<sub>2</sub>Cl<sub>2</sub> (200 mL). After cooling, MeSO<sub>3</sub>H (3.3 mL, 51.0 mmol, 20.0 equiv) was added to the resulting solution, and the mixture was stirred for 1 h. Aqueous NaOH was added until the solution became strongly basic. The organic phase was separated, dried over anhydrous Na<sub>2</sub>SO<sub>4</sub>, and evaporated under reduced pressure. The residue was dissolved with hot toluene (500 mL) and filtered through a bed of silica gel. The filtrate was evaporated under reduced pressure. The residue was successively washed with hexane (200 mL) and Et<sub>2</sub>O (200 mL). The material collected by filtration was recrystallized from CH<sub>2</sub>Cl<sub>2</sub>/hexane to give *meso*-**4** (348 mg, 0.628 mmol, 24%) as a pale yellow solid. The filtrate resulting from washing with hexane and Et<sub>2</sub>O was evaporated under reduced pressure. The residue was subjected to column chromatography (SiO<sub>2</sub>, toluene/hexane 1:7) to give the mixture of *meso*-**4** and *rac*-**4** (193 mg, 0.349 mmol, 14%) and the pure *rac*-**4** (32.1 mg, 58.1 μmol, 2%, total yield 40%) as pale yellow solids; The ratio of *meso*-**4** to *rac*-**4** in the mixture was determined to be ca. 1 to 9 based on the <sup>1</sup>H NMR spectroscopy.

*meso*-4: M.p. 392–394 °C. <sup>1</sup>H NMR (CDCl<sub>3</sub> + Et<sub>3</sub>N, 400 MHz) δ 7.53 (2H, s), 7.27 (2H, dd, *J* = 1.3 & 7.8 Hz), 7.26 (2H, dd, *J* = 1.6 & 7.6 Hz), 7.13 (2H, td, *J* = 1.4 & 7.8 Hz), 7.09 (2H, td, *J* = 1.6 & 7.6 Hz), 7.06 (2H, dd, *J* = 1.6 & 7.6 Hz), 7.06 (2H, d, *J* = 7.8 Hz), 7.04–7.00 (2H, m), 1.75 (6H, s), 1.13 (6H, s) ppm. <sup>13</sup>C NMR (CDCl<sub>3</sub> + Et<sub>3</sub>N, 100 MHz) δ 143.14, 138.39, 136.35, 135.32, 135.12, 128.30, 127.52, 125.88, 124.72, 124.61, 124.08, 122.25, 118.40, 115.46, 36.69, 33.40, 22.96 ppm (17 signals out of 18 expected). UV–vis (CH<sub>2</sub>Cl<sub>2</sub>): λ<sub>max</sub><sup>abs</sup> (ε) 360 (7800, sh), 319 (24800), 305 (20600, sh), 262 (27500) nm. HRMS (FT, positive): *m/z* calcd for C<sub>36</sub>H<sub>28</sub>N<sub>2</sub>S<sub>2</sub> 553.1766, found 553.1770 [(M + H)<sup>+</sup>].

*rac*-4: M.p. 383–384 °C. <sup>1</sup>H NMR (CDCl<sub>3</sub> + Et<sub>3</sub>N, 400 MHz) δ 7.51 (2H, s), 7.32 (2H, dd, *J* = 1.1 & 8.2 Hz), 7.28 (2H, dd, *J* = 1.3 & 7.8 Hz), 7.23–6.97 (10H, m) 1.73 (6H, s), 1.26 (6H, s) ppm. <sup>13</sup>C NMR (CDCl<sub>3</sub> + Et<sub>3</sub>N, 100 MHz) δ 143.36, 138.40, 136.68, 135.50, 135.33, 128.38, 127.49, 126.01, 124.68, 124.28, 123.99, 122.27, 118.24, 115.18, 36.69, 33.98, 23.16 ppm (17 signals out of 18 expected). UV–vis (CH<sub>2</sub>Cl<sub>2</sub>): λ<sub>max</sub><sup>abs</sup> (ε) 355 (8100, sh), 322 (25100), 305 (18800, sh), 264 (27900) nm. HRMS (FT, positive): *m/z* calcd for C<sub>36</sub>H<sub>28</sub>N<sub>2</sub>S<sub>2</sub> 553.1766, found 553.1768 [(M + H)<sup>+</sup>].

**Note:** The UV-vis absorption spectrum of *rac*-4 is almost consistent with that of *meso*-4.

### Preparation of diester 6

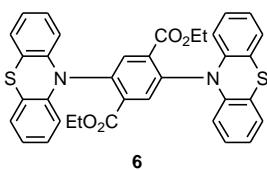

To the mixture of diethyl 2,5-dibromoterephthalate (**5**) (2.00 g, 5.26 mmol), CuI (803 mg, 4.21 mmol, 0.8 equiv), K<sub>2</sub>CO<sub>3</sub> (2.92 g, 21.1 mmol, 4.0 equiv), and phenothiazine (2.31 g, 11.6 mmol, 2.2 equiv) was added *o*-dichlorobenzene (15 mL), which was bubbled with nitrogen for 30 min. The mixture was stirred at 180 °C for 12 h under a nitrogen atmosphere. After cooling, the resulting suspension was filtered through a bed of Celite. The filtrate was evaporated under reduced pressure. The residue was washed by Soxhlet's extractor with hexane for 12 h to give diester **6** (2.08 g, 3.37 mmol, 64%) as a deep purple solid.

M.p. 252–254 °C. <sup>1</sup>H NMR (CDCl<sub>3</sub> + Et<sub>3</sub>N, 400 MHz) δ 8.26 (2H, s), 7.01 (4H, dd, *J* = 1.4 & 8.1 Hz), 6.90 (4H, td, *J* = 1.4 & 8.1 Hz), 6.83 (4H, td, *J* = 1.4 & 8.1 Hz), 6.07 (4H, dd, *J* = 1.4 & 8.1 Hz), 4.16 (4H, q, *J* = 7.6 Hz) 1.00 (6H, t, *J* = 7.6 Hz) ppm. <sup>13</sup>C NMR (CDCl<sub>3</sub> + Et<sub>3</sub>N, 100 MHz) δ 164.22, 143.16, 139.98, 139.24, 138.24, 127.05, 126.87, 122.82, 119.52, 115.32, 62.37, 13.58 ppm (12 signals out of 12 expected). UV–vis (CH<sub>2</sub>Cl<sub>2</sub>): λ<sub>max</sub><sup>abs</sup> (ε) 308 (7900), 255 (89300) nm. HRMS (FT, positive): *m/z* calcd for C<sub>36</sub>H<sub>28</sub>N<sub>2</sub>O<sub>4</sub>S<sub>2</sub> 616.1485, found 616.1475 [M<sup>+</sup>].

### Preparation of diol 7

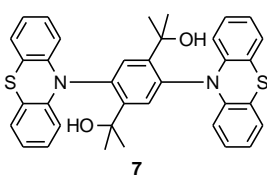

To a solution of diester **6** (3.04 g, 4.86 mmol) in toluene (225 mL) was added MeMgBr (3.04 mol L<sup>-1</sup>, 225 mL, 58.3 mmol, 12 equiv) at room temperature under a nitrogen atmosphere. The resulting solution was stirred at 100 °C for 12 h. After the addition of ice water (200 mL), the organic phase was separated, and the aqueous phase was extracted with toluene/EtOAc (1:1, 20 mL × 16). The combined organic phase was washed with brine (25 mL × 6), dried over anhydrous Na<sub>2</sub>SO<sub>4</sub>, and evaporated under reduced

pressure. The residue was washed with pentane (200 mL) and collected by filtration to give diol **7** (2.24 g, 3.80 mmol, 78%) as a pale yellow solid.

M.p. 256–258 °C.  $^1\text{H NMR}$  ( $\text{CDCl}_3 + \text{Et}_3\text{N}$ , 400 MHz)  $\delta$  7.86 (2H, s), 7.22 (4H, dd,  $J = 1.5$  & 7.6 Hz), 7.03 (4H, td,  $J = 1.4$  & 7.6 Hz), 6.97 (4H, td,  $J = 1.5$  & 7.6 Hz), 6.42 (4H, dd,  $J = 1.4$  & 7.6 Hz), 1.56 (12H, s) ppm.  $^{13}\text{C NMR}$  ( $\text{CDCl}_3 + \text{Et}_3\text{N}$ , 100 MHz)  $\delta$  148.06, 145.46, 137.25, 135.38, 127.56, 127.44, 123.58, 121.60, 116.38, 72.59, 30.98 (13 signals out of 13 expected) ppm. UV–vis ( $\text{CH}_2\text{Cl}_2$ ):  $\lambda_{\text{max}}^{\text{abs}}$  ( $\epsilon$ ) 310 (6300), 255 (78600) nm. HRMS (FT, positive):  $m/z$  calcd for  $\text{C}_{36}\text{H}_{32}\text{N}_2\text{NaO}_2\text{S}_2$  611.1797, found 611.1798  $[(\text{M} + \text{Na})^+]$ .

### Preparation of radical cation salt *meso*-4 $^{+\bullet}$ [NTf $_2$ ]

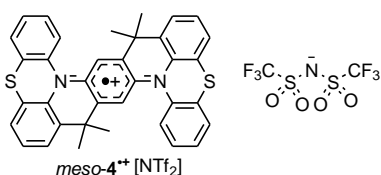

To a solution of *meso*-4 (30 mg, 54  $\mu\text{mol}$ ) in  $\text{CH}_2\text{Cl}_2$  (40 mL) was added silver bis(trifluoromethanesulfonyl)imide (23 mg, 57  $\mu\text{mol}$ , 1.05 equiv) at room temperature for a nitrogen atmosphere. After stirring for 1 h, the resulting suspension was filtered by a membrane filter. The filtrate was evaporated under reduced pressure. The residue was recrystallized from  $\text{CH}_2\text{Cl}_2$ /cyclohexane to give radical cation salt *meso*-4 $^{+\bullet}$ [NTf $_2$ ] (27 mg, 33  $\mu\text{mol}$ , 60%) as dark brown crystals.

M.p. 372–374 °C.  $^1\text{H NMR}$  ( $\text{CDCl}_3$ , 400 MHz) No peak appeared. UV–vis–NIR ( $\text{CH}_2\text{Cl}_2$ ):  $\lambda_{\text{max}}^{\text{abs}}$  ( $\epsilon$ ) 258 (34900), 376 (6400, sh), 429 (13700), 499 (3700), 1615 (23900) nm. EPR (0.1 mM  $\text{CH}_2\text{Cl}_2$  solution):  $|a(^{14}\text{N})| = 0.492$  mT. HRMS (ESI, positive)  $m/z$  calcd for  $\text{C}_{36}\text{H}_{28}\text{N}_2\text{S}_2$  552.1688, found 552.1690  $[\text{M}^+]$ . HRMS (ESI, negative)  $m/z$  calcd for  $\text{C}_2\text{O}_4\text{NF}_6\text{S}_2$  279.9178, found 279.9177  $[(\text{M} - \text{C}_{36}\text{H}_{28}\text{N}_2\text{S}_2)^-]$ . Anal. Calcd for  $\text{C}_{38}\text{H}_{28}\text{F}_6\text{N}_3\text{O}_4\text{S}_4$ : C, 54.80; H, 3.39; N 5.05. Found: C, 54.80; H, 3.49; N, 5.08.

### Preparation of radical cation salt TPPD $^{+\bullet}$ [NTf $_2$ ]

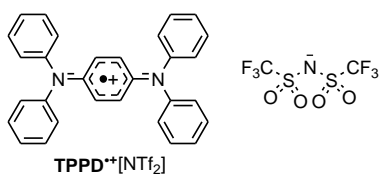

To a solution of *N,N,N',N'*-tetraphenyl-1,4-phenylenediamine (TPPD, 30 mg, 73  $\mu\text{mol}$ ) in  $\text{CH}_2\text{Cl}_2$  (40 mL) was added silver bis(trifluoromethanesulfonyl)imide (30 mg, 76  $\mu\text{mol}$ , 1.05 equiv) at room temperature for a nitrogen atmosphere. After stirring for 1 h, the resulting suspension was filtered by a membrane filter. The filtrate was evaporated under reduced pressure. The residue was recrystallized from  $\text{CH}_2\text{Cl}_2$ /cyclohexane to give radical cation salt TPPD $^{+\bullet}$ [NTf $_2$ ] (41 mg, 60  $\mu\text{mol}$ , 82%) as dark green crystals.

M.p. 168–170 °C.  $^1\text{H NMR}$  ( $\text{CDCl}_3$ , 400 MHz) No peak appeared. UV–vis–NIR ( $\text{CH}_2\text{Cl}_2$ ):  $\lambda_{\text{max}}^{\text{abs}}$  ( $\epsilon$ ) 257 (11500), 346 (10700), 408 (21600), 858 (18000) nm. EPR (0.1 mM  $\text{CH}_2\text{Cl}_2$  solution):  $|a(^{14}\text{N})| = 0.551$  mT. HRMS (ESI, positive)  $m/z$  calcd for  $\text{C}_{30}\text{H}_{24}\text{N}_2$  412.1934, found 412.1937  $[\text{M}^+]$ . HRMS (ESI, negative)  $m/z$  calcd for  $\text{C}_2\text{O}_4\text{NF}_6\text{S}_2$  279.9178, found 279.9177  $[(\text{M} - \text{C}_{30}\text{H}_{24}\text{N}_2)^-]$ . Anal. Calcd for  $\text{C}_{32}\text{H}_{24}\text{F}_6\text{N}_3\text{O}_4\text{S}_2$ : C, 55.49; H, 3.49; N 6.07. Found: C, 55.50; H, 3.58; N, 6.16.

## 2. X-ray crystallographic data

**General procedures.** Low-temperature X-ray diffraction data for *meso-4*, *rac-4*, *meso-4*<sup>+</sup>[NTf<sub>2</sub>], and TPPD<sup>+</sup>[NTf<sub>2</sub>] were collected on a Rigaku AFC10 diffractometer coupled to a Rigaku AFC HyPix-6000 detector with Mo K $\alpha$  radiation ( $\lambda = 0.71073$  Å) or Cu-K $\alpha$  radiation ( $\lambda = 1.54184$  Å) from an FR-E+ X-ray source. The diffraction images were processed and spaced using the CrysAlisPro software.<sup>[2]</sup> Using Olex2,<sup>[3]</sup> the structures were solved through intrinsic phasing using SHELXT<sup>[4]</sup> and refined against  $F^2$  on all data by full-matrix least squares with SHELXL<sup>[5]</sup> following established refinement strategies. All non-hydrogen atoms were refined anisotropically. All hydrogen atoms bound to carbon were included in the model at geometrically calculated positions and refined using a riding model. The isotropic displacement parameters of all hydrogen atoms were fixed to 1.2 times the Ueq value of the atoms they are linked to (1.5 times for methyl groups).

*meso-4*: crystal data at 100 K for C<sub>36</sub>H<sub>28</sub>N<sub>2</sub>S<sub>2</sub>,  $M_r = 552.72$ , Orthorhombic, space group *Pna*2<sub>1</sub>,  $D_{\text{calcd}} = 1.387$  g cm<sup>-3</sup>,  $Z = 4$ ,  $a = 25.8351(9)$  Å,  $b = 12.3566(5)$  Å,  $c = 8.2933(3)$  Å,  $\alpha = \beta = \gamma = 90^\circ$ ,  $V = 2647.50(17)$  Å<sup>3</sup>; Mo-K $\alpha$  radiation,  $\lambda = 0.71073$ ,  $\mu = 0.232$  mm<sup>-1</sup>. Numbers of measured and unique reflections were 28457 [ $R_{\text{int}} = 0.0400$ ,  $R_{\text{sigma}} = 0.0329$ ] and 5846, respectively. Final  $R(F) = 0.0322$  for 365 parameters and 5846 reflections with  $I > 2\sigma(I)$  (for all data,  $R(F)$  and  $wR(F^2)$  values are 0.0371 and 0.0768, respectively). CCDC-2178575.

*rac-4*: Crystal data at 100 K for C<sub>36</sub>H<sub>28</sub>N<sub>2</sub>S<sub>2</sub>,  $M_r = 552.72$ , Tetragonal, space group *I*-4,  $D_{\text{calcd}} = 1.257$  g cm<sup>-3</sup>,  $Z = 8$ ,  $a = b = 25.3366(5)$  Å,  $c = 9.1010(3)$  Å,  $\alpha = \beta = \gamma = 90^\circ$ ,  $V = 5842.3(3)$  Å<sup>3</sup>; Mo-K $\alpha$  radiation,  $\lambda = 0.71073$ ,  $\mu = 0.210$  mm<sup>-1</sup>. Numbers of measured and unique reflections were 20806 [ $R_{\text{int}} = 0.0329$ ,  $R_{\text{sigma}} = 0.0343$ ] and 6585, respectively. Final  $R(F) = 0.0296$  for 365 parameters and 6585 reflections with  $I > 2\sigma(I)$  (for all data,  $R(F)$  and  $wR(F^2)$  values are 0.0333 and 0.0704, respectively). CCDC-2178576.

*meso-4*<sup>+</sup>[NTf<sub>2</sub>]: Crystal data at 100 K for C<sub>36</sub>H<sub>28</sub>N<sub>2</sub>S<sub>2</sub>·C<sub>2</sub>F<sub>6</sub>NO<sub>4</sub>S<sub>2</sub>·0.5(CH<sub>2</sub>Cl<sub>2</sub>),  $M_r = 876.34$ , Monoclinic, space group *C2/c*,  $D_{\text{calcd}} = 1.564$  g cm<sup>-3</sup>,  $Z = 8$ ,  $a = 31.1922(15)$  Å,  $b = 9.4751(3)$  Å,  $c = 28.2134(13)$  Å,  $\alpha = \gamma = 90^\circ$ ,  $\beta = 116.638(6)^\circ$ ,  $V = 7453.4(7)$  Å<sup>3</sup>; Cu-K $\alpha$  radiation,  $\lambda = 1.54184$ ,  $\mu = 3.684$  mm<sup>-1</sup>. Numbers of measured and unique reflections were 27669 [ $R_{\text{int}} = 0.0793$ ,  $R_{\text{sigma}} = 0.0732$ ] and 7571, respectively. Final  $R(F) = 0.0452$  for 524 parameters and 7571 reflections with  $I > 2\sigma(I)$  (for all data,  $R(F)$  and  $wR(F^2)$  values are 0.0730 and 0.1111, respectively). CCDC-2178577.

TPPD<sup>+</sup>[NTf<sub>2</sub>]: Crystal data at 100 K for C<sub>32</sub>H<sub>24</sub>F<sub>6</sub>N<sub>3</sub>O<sub>4</sub>S<sub>2</sub>,  $M_r = 692.66$ , Monoclinic, space group *C2/c*,  $D_{\text{calcd}} = 1.524$  g cm<sup>-3</sup>,  $Z = 4$ ,  $a = 17.5219(3)$  Å,  $b = 7.73607(11)$  Å,  $c = 22.8391(4)$  Å,  $\alpha = \gamma = 90^\circ$ ,  $\beta = 102.7930(17)^\circ$ ,  $V = 3019.01(8)$  Å<sup>3</sup>; Cu-K $\alpha$  radiation,  $\lambda = 1.54184$ ,  $\mu = 2.326$  mm<sup>-1</sup>. Numbers of measured and unique reflections were 14341 [ $R_{\text{int}} = 0.0336$ ,  $R_{\text{sigma}} = 0.0235$ ] and 3028, respectively.

Final  $R(F) = 0.0413$  for 272 parameters and 3028 reflections with  $I > 2\sigma(I)$  (for all data,  $R(F)$  and  $wR(F^2)$  values are 0.0452 and 0.1167, respectively). CCDC-2178578.

### 3. Supporting figures, scheme, and tables

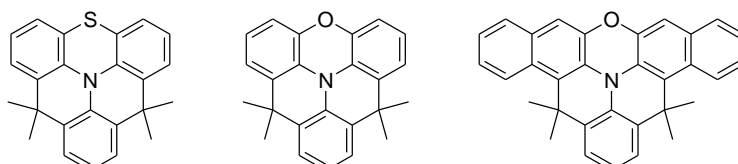

**Figure S1.** Chemical structures of S,C,C-bridged triphenylamine as well as O,C,C-bridged triphenylamine and dinaphthylphenylamine, which provide stable radical cations via chemical oxidation, reported by our group.<sup>[6,7]</sup>

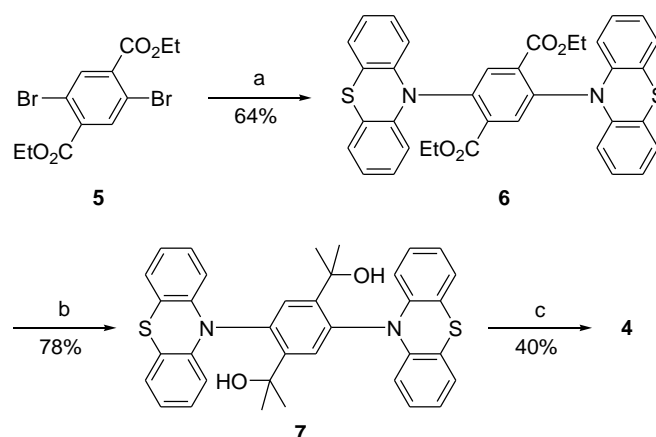

**Scheme S1.** Synthesis of S,C-bridged tetraphenyl-*para*-phenylenediamine **4**.  
*Reagents and conditions:* (a) CuI, K<sub>2</sub>CO<sub>3</sub>, phenothiazine, *o*-dichlorobenzene, 180 °C. (b) MeMgBr, toluene, 100 °C. (c) MeSO<sub>3</sub>H, CH<sub>2</sub>Cl<sub>2</sub>, rt.

As shown in Scheme S1, **4** was synthesized in three steps from diethyl 2,5-dibromoterephthalate **5**. Amination of **5** with PTZ in the presence of CuI and K<sub>2</sub>CO<sub>3</sub> provided diester **6** in 64% yield. The nucleophilic addition of MeMgBr to **6** followed by hydrolysis furnished diol **7** in 78% yield. Treatment of **7** with MeSO<sub>3</sub>H resulted in a two-fold Friedel–Crafts cyclization to afford **4** in 40% yield.

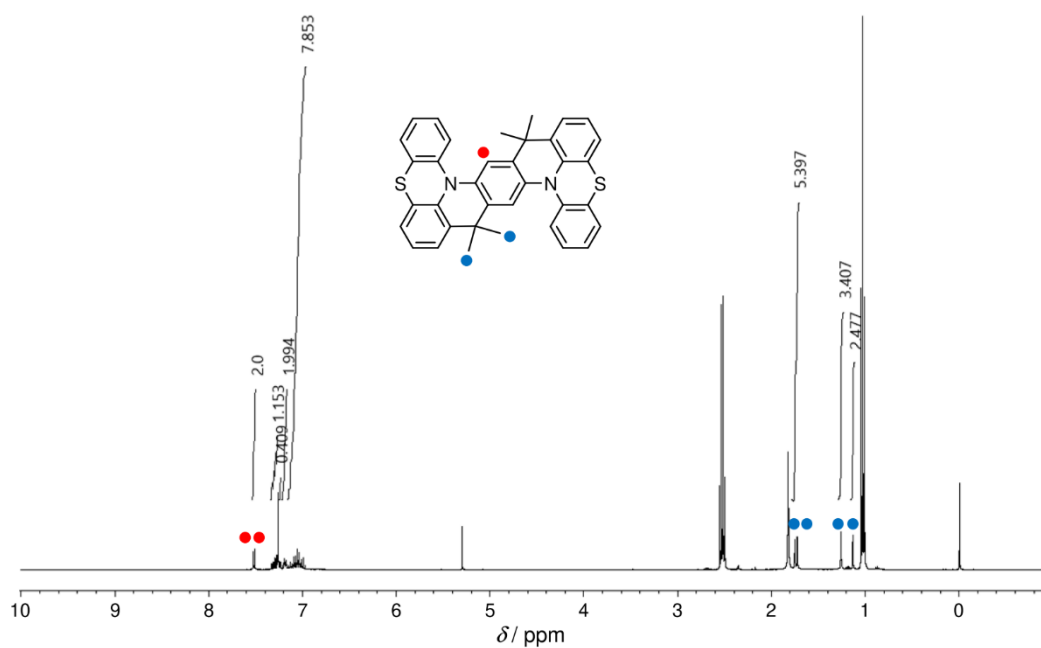

**Figure S2.** <sup>1</sup>H NMR spectrum of the mixture of *meso*-**4** and *racemi*-**4** in CHCl<sub>3</sub>/Et<sub>3</sub>N solution (400 MHz).

The ratio of *meso*-**4** and *rac*-**4** in the crude product was determined to be 1.3 to 1.0 by the <sup>1</sup>H NMR spectroscopy (Figure S2).

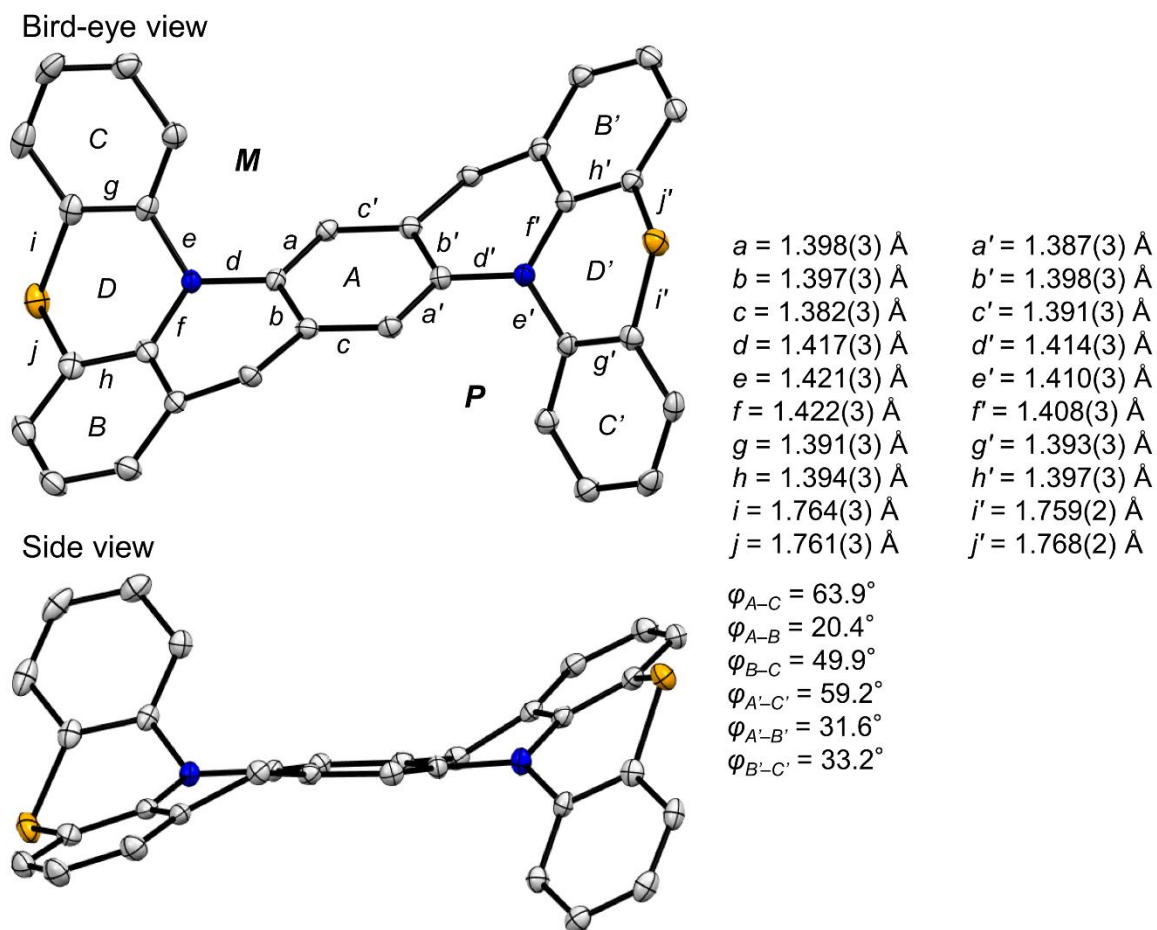

**Figure S3.** X-ray crystal structure of *meso*-4. Displacement ellipsoids are shown at the 50% probability level. Hydrogen atoms and Me groups are omitted for clarity.



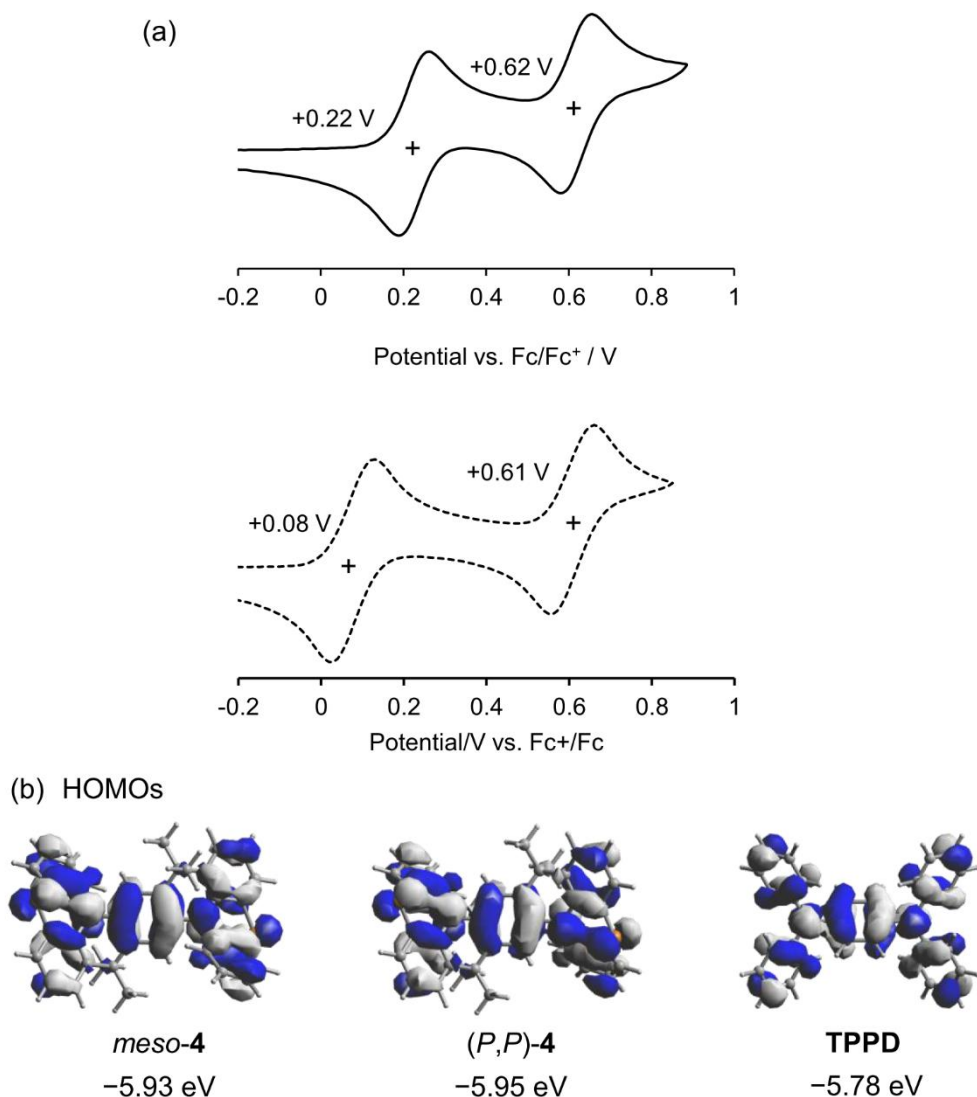

**Figure S4.** (a) Cyclic voltammograms of (top) *meso-4* and (bottom) **TPPD** at scan rate 100 mV/s in CH<sub>2</sub>Cl<sub>2</sub> (0.1 mol L<sup>-1</sup> [(*n*-Bu)<sub>4</sub>N][PF<sub>6</sub>]). (b) HOMOs of *meso-4*, (*P,P*)-**4**, and **TPPD** calculated at the  $\omega$ B97XD/6-311+G(d,p) level of theory.

**Table S1.** Cyclic Voltammetry Data

| Cmpd.                   | $E_1$ [V] | $E_2$ [V] | $\Delta E$ ( $E_2 - E_1$ ) [V] | $K_c^a$           |
|-------------------------|-----------|-----------|--------------------------------|-------------------|
| <i>meso-4</i>           | +0.22     | +0.62     | 0.40                           | $5.3 \times 10^6$ |
| <b>TPPD</b>             | +0.08     | +0.61     | 0.53                           | $8.0 \times 10^8$ |
| <b>BPB</b> <sup>b</sup> | +0.28     | +0.42     | 0.14                           | $2.3 \times 10^2$ |

<sup>a</sup> Comproportionation constant of the radical cationic species.

<sup>b</sup> The values are taken from ref [8].

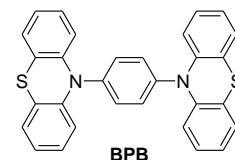

The  $E_1$  value of *meso-4* is more negative than that of **BPB** (Table S1), and the  $\Delta E$  of the former is larger than that of the latter. Consequently, the  $K_c$  value of *meso-4* is substantially larger than that of **BPB**. These results indicate that the electronic communication between the two N atoms in *meso-4* is stronger than that in **BPB**, which is apparently due to the C-bridging.

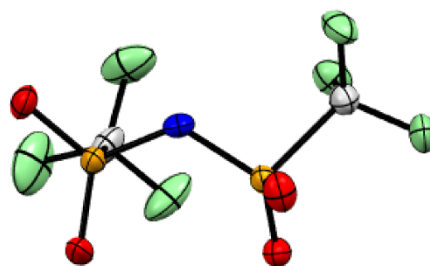

Bird-eye view

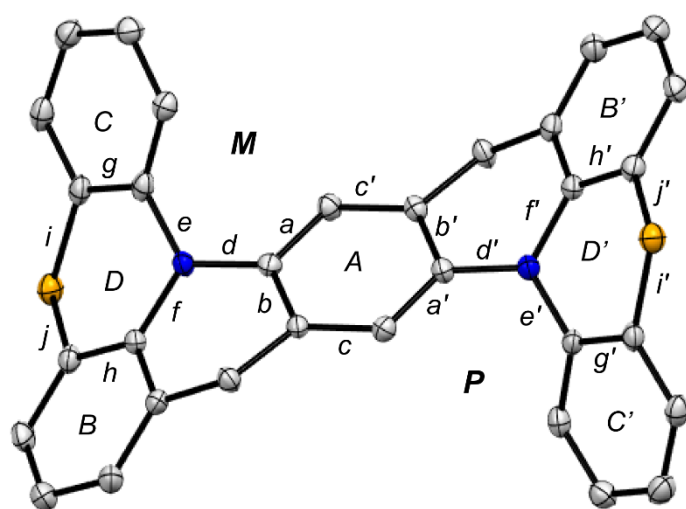

|                            |                             |
|----------------------------|-----------------------------|
| $a = 1.411(3) \text{ \AA}$ | $a' = 1.411(4) \text{ \AA}$ |
| $b = 1.413(4) \text{ \AA}$ | $b' = 1.412(4) \text{ \AA}$ |
| $c = 1.375(3) \text{ \AA}$ | $c' = 1.369(4) \text{ \AA}$ |
| $d = 1.388(3) \text{ \AA}$ | $d' = 1.392(3) \text{ \AA}$ |
| $e = 1.425(3) \text{ \AA}$ | $e' = 1.415(3) \text{ \AA}$ |
| $f = 1.421(3) \text{ \AA}$ | $f' = 1.413(3) \text{ \AA}$ |
| $g = 1.399(4) \text{ \AA}$ | $g' = 1.402(4) \text{ \AA}$ |
| $h = 1.399(4) \text{ \AA}$ | $h' = 1.393(4) \text{ \AA}$ |
| $i = 1.754(3) \text{ \AA}$ | $i' = 1.753(3) \text{ \AA}$ |
| $j = 1.762(3) \text{ \AA}$ | $j' = 1.748(3) \text{ \AA}$ |

Side view

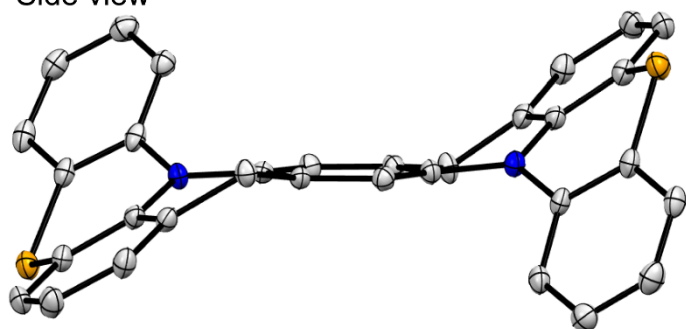

|                                |
|--------------------------------|
| $\varphi_{A-C} = 54.5^\circ$   |
| $\varphi_{A-B} = 32.3^\circ$   |
| $\varphi_{B-C} = 29.2^\circ$   |
| $\varphi_{A'-C'} = 61.7^\circ$ |
| $\varphi_{A'-B'} = 36.6^\circ$ |
| $\varphi_{B'-C'} = 34.3^\circ$ |

**Figure S5.** X-ray crystal structure of *meso*-4<sup>+</sup>[NTf<sub>2</sub>]. Displacement ellipsoids are shown at the 50% probability level. Hydrogen atoms, Me groups, and a solvent molecule are omitted for clarity.

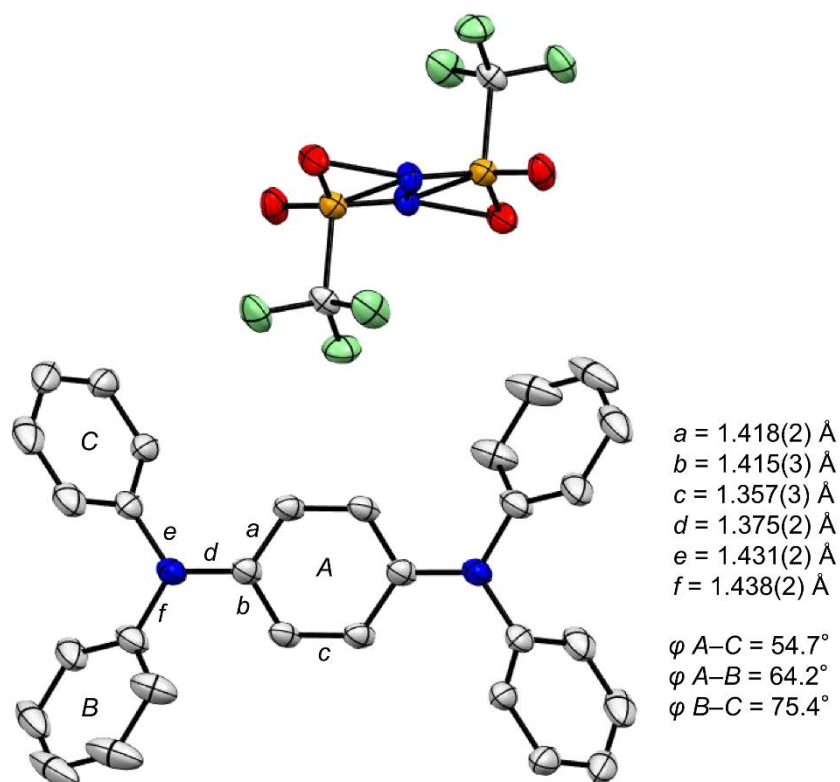

**Figure S6.** X-ray crystal structure of  $\text{TPPD}^+[\text{NTf}_2]^-$ . Displacement ellipsoids are shown at the 50% probability level. Hydrogen atoms are omitted for clarity.

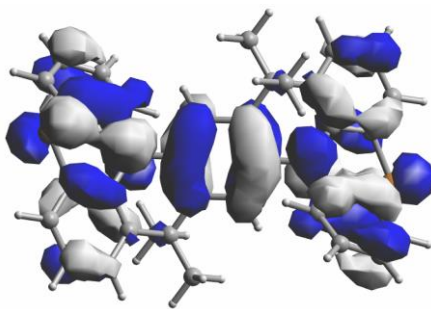

**Figure S7.** HOMO of *meso-4* calculated at the M06-2X/6-31G(d) level of theory.

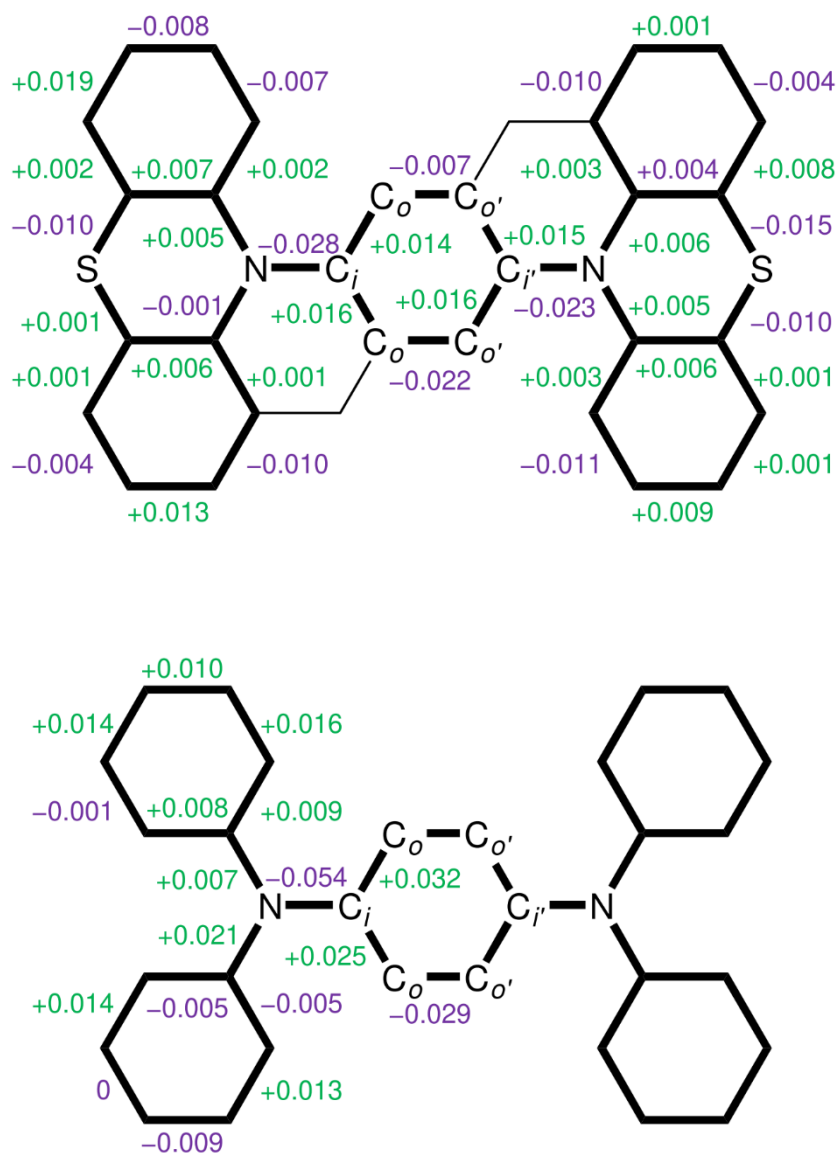

**Figure S8.** Averaged bond-length differences in Å for (top) *meso-4* and (bottom) TPPD upon one-electron oxidation (radical cation minus neutral). The values of bond lengths for the neutral TPPD are taken from ref [9].

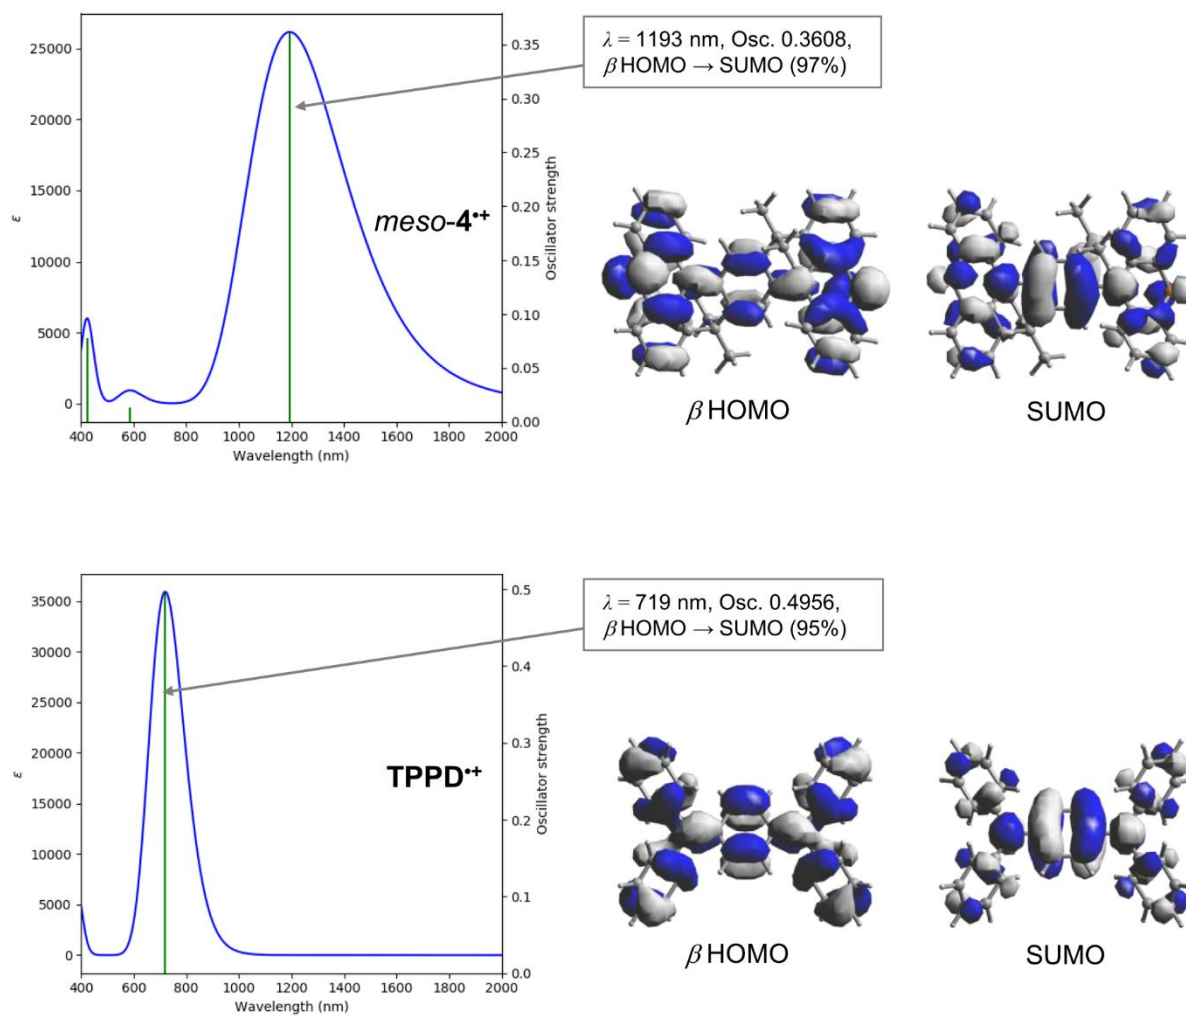

**Figure S9.** Results of TD-DFT calculations for *meso-4<sup>++</sup>* and **TPPD<sup>++</sup>** calculated at the TD-UM06-2X/6-31G(d)//UM06-2X/6-31G(d) level of theory.

**Table S2.** Characteristic Electron-Transfer Parameters Obtained through Mulliken–Hush Analysis of the NIR Absorption Bands<sup>a</sup>

| Cmpd                                  | <i>R</i><br>[Å] <sup>b</sup> | $\lambda_{\text{MH}}$<br>[10 <sup>3</sup> cm <sup>-1</sup> ] <sup>c</sup> | $\Delta\nu_{\text{max}}$<br>[10 <sup>3</sup> cm <sup>-1</sup> ] <sup>d</sup> | $\epsilon$<br>[10 <sup>3</sup> M <sup>-1</sup> cm <sup>-1</sup> ] <sup>e</sup> | $V_{\text{MH}}$<br>[10 <sup>3</sup> cm <sup>-1</sup> ] <sup>f</sup> | $\Delta G^\ddagger$<br>[kcal mol <sup>-1</sup> ] <sup>g</sup> |
|---------------------------------------|------------------------------|---------------------------------------------------------------------------|------------------------------------------------------------------------------|--------------------------------------------------------------------------------|---------------------------------------------------------------------|---------------------------------------------------------------|
| <i>meso-4</i> <sup>+</sup>            | 5.5                          | 6.2                                                                       | 2.6                                                                          | 23.9                                                                           | 2.3                                                                 | 0.3                                                           |
| <b>TPPD</b> <sup>+</sup> <sup>h</sup> | 5.6                          | 11.3                                                                      | 4.3                                                                          | 18.0                                                                           | 3.5                                                                 | 1.2                                                           |
| <b>BPB</b> <sup>+</sup> <sup>i</sup>  | 5.6 <sup>j</sup>             | 10.3                                                                      | 3.2                                                                          | 0.86                                                                           | 0.62                                                                | 5.7                                                           |

<sup>a</sup> See ref [8]. <sup>b</sup> The distance between the two nitrogen atoms based on the single-crystal X-ray structures. <sup>c</sup> The reorganization energy that is evaluated from the IV-CT absorption band, i.e.,  $\lambda_{\text{MH}} = \lambda_{\text{max}}$ . <sup>d</sup> Bandwidth at half-height. <sup>e</sup> Molar absorption coefficient in the IV-CT band. <sup>f</sup> Electronic coupling element  $V_{\text{MH}} = 0.0206 \times (\lambda_{\text{MH}} \times \Delta\nu_{\text{max}} \times \epsilon)^{1/2} / R$ . <sup>g</sup> Electron-transfer activation barrier =  $(\lambda_{\text{MH}} - 2V_{\text{MH}})^2 / 4\lambda_{\text{MH}}$ . The radical cations are hypothetically assumed to be Robin–Day class II compounds. <sup>h</sup> In ref [9], **TPPD**<sup>+</sup> is assigned to be a class III compound. <sup>i</sup> In ref [8], **BPB**<sup>+</sup> is assigned to be a class II compound. <sup>j</sup> In ref [8], the distance (8.6 Å) is defined as that between the centers of the two phenothiazine moieties.

We estimated the characteristic electron-transfer parameters for *meso-4*<sup>+</sup> as well as **TPPD**<sup>+</sup> and **BPB**<sup>+</sup> (Table S2). We consider that *meso-4*<sup>+</sup> is very close to the class II/III boundary, and thus the electron spin and positive charge are delocalized over almost the entire  $\pi$ -conjugated framework according to the following three findings.

- (1) The radical cations **TPPD**<sup>+</sup> and **BPB**<sup>+</sup> are assigned to be Robin–Day class III and class II compounds, respectively, in the literature.<sup>[8,9]</sup> The  $V_{\text{MH}}$  value for *meso-4*<sup>+</sup> (2310 cm<sup>-1</sup>) is slightly smaller than that for **TPPD**<sup>+</sup> (3450 cm<sup>-1</sup>) and significantly larger than that for **BPB**<sup>+</sup> (620 cm<sup>-1</sup>).
- (2) The  $V_{\text{MH}}$  value for *meso-4*<sup>+</sup> (2310 cm<sup>-1</sup>) is smaller than its  $\lambda_{\text{MH}}/2$  value (3120 cm<sup>-1</sup>).
- (3) When both **TPPD**<sup>+</sup> and *meso-4*<sup>+</sup> are hypothetically assumed to be class II compounds, the  $\Delta G^\ddagger$  value for *meso-4*<sup>+</sup> (0.3 kcal mol<sup>-1</sup>) is still smaller than that for **TPPD**<sup>+</sup> (1.2 kcal mol<sup>-1</sup>).

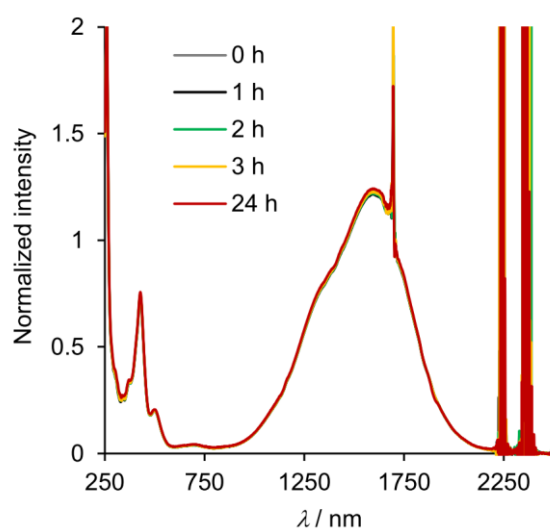

**Figure S10.** Time profiles of UV-vis-NIR spectra of *meso*-4<sup>+</sup>[NTf<sub>2</sub>] in CH<sub>2</sub>Cl<sub>2</sub>.

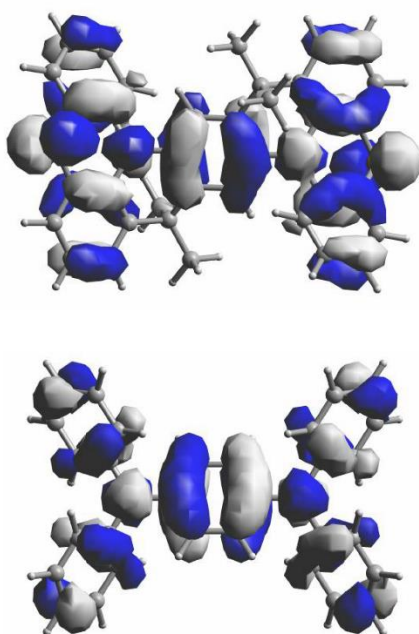

**Figure S11.** SOMO of (top) *meso*-4<sup>+</sup> and (bottom) TPPD<sup>+</sup> calculated at the UM06-2X/6-31G(d) level of theory.

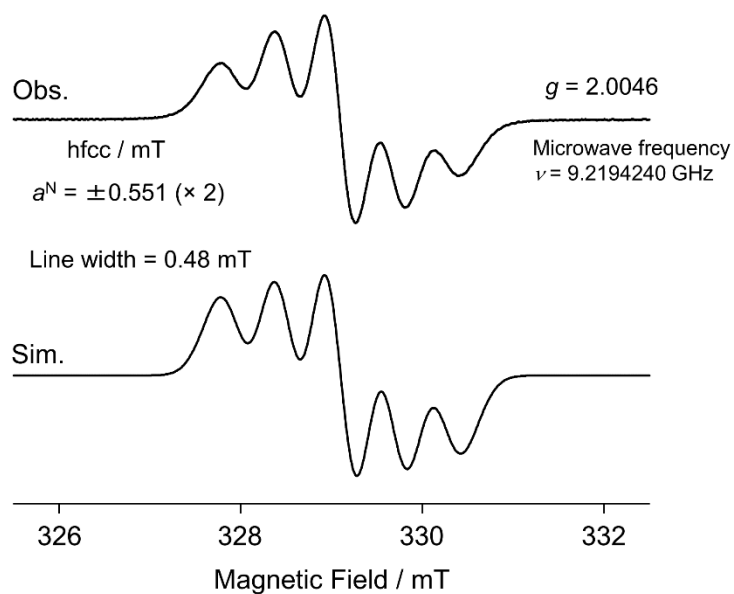

**Figure S12.** Experimentally observed EPR spectrum (top) of **TPPD<sup>+</sup>** in  $\text{CH}_2\text{Cl}_2$  at room temperature and the simulated spectrum (bottom).



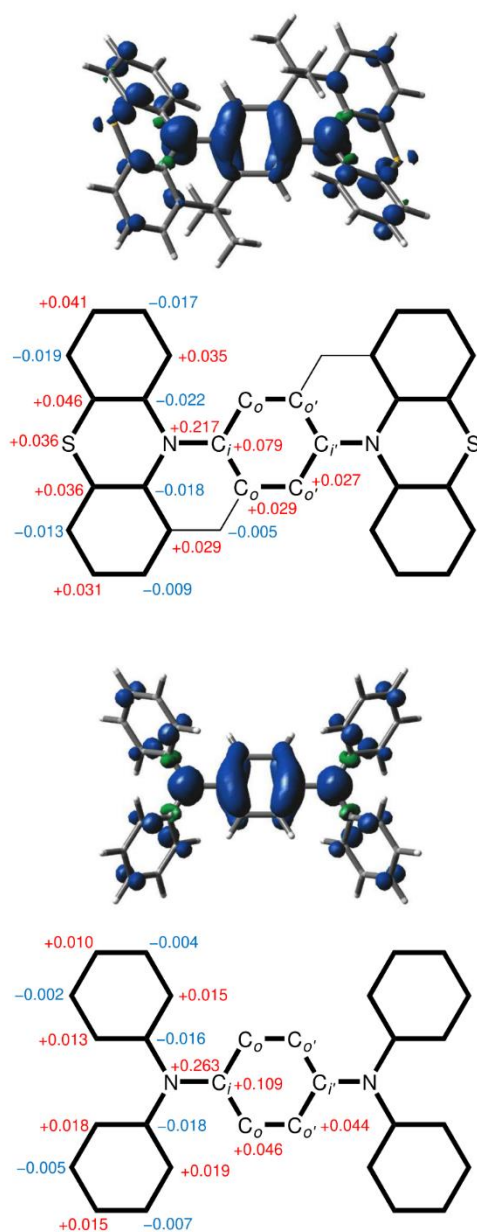

**Figure S13.** Spin-density map and Mulliken atomic spin density values of (top) *meso-4*<sup>++</sup> and (bottom) TPPD<sup>++</sup> calculated at the UM06-2X/6-31G(d) level of theory (isovalue: 0.005).

The Mulliken atomic spin density (MSD) value for the nitrogen atoms of *meso-4*<sup>++</sup> (+0.217) is smaller than that of the nitrogen atoms in TPPD<sup>++</sup> (+0.263) (Fig. S13). This result is consistent with the trend observed in the  $a_N$  values. The MSD values for the  $C_i$ ,  $C_o$ , and  $C_{o'}$  carbons of *meso-4*<sup>++</sup> are also smaller than the corresponding values found in TPPD<sup>++</sup>. A subtle but distinctive MSD value is found for the sulfur atoms of *meso-4*<sup>++</sup> (+0.036). In addition, the MSD values for the carbon atoms of the B/B'-D/D' rings in *meso-4*<sup>++</sup> (+0.029 – +0.046) are generally more positive than those observed in TPPD<sup>++</sup> (+0.010 – +0.019). This result highlights that the sulfur and carbon bridges in *meso-4*<sup>++</sup> enable the spin density to delocalize from ring A and the nitrogen atoms to the B/B'-D/D' rings, namely, the PTZ moieties.

Top view

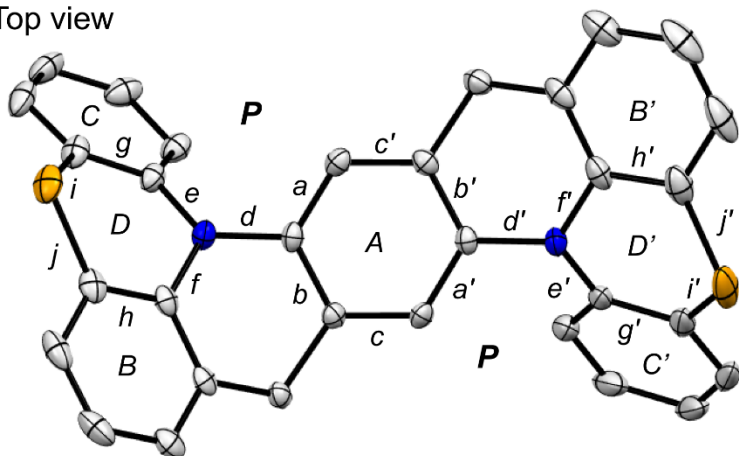

|                            |                             |
|----------------------------|-----------------------------|
| $a = 1.386(3) \text{ \AA}$ | $a' = 1.388(3) \text{ \AA}$ |
| $b = 1.403(3) \text{ \AA}$ | $b' = 1.395(3) \text{ \AA}$ |
| $c = 1.390(3) \text{ \AA}$ | $c' = 1.389(3) \text{ \AA}$ |
| $d = 1.411(2) \text{ \AA}$ | $d' = 1.411(2) \text{ \AA}$ |
| $e = 1.412(2) \text{ \AA}$ | $e' = 1.408(3) \text{ \AA}$ |
| $f = 1.407(3) \text{ \AA}$ | $f' = 1.410(3) \text{ \AA}$ |
| $g = 1.397(3) \text{ \AA}$ | $g' = 1.401(3) \text{ \AA}$ |
| $h = 1.392(3) \text{ \AA}$ | $h' = 1.391(3) \text{ \AA}$ |
| $i = 1.764(2) \text{ \AA}$ | $i' = 1.761(3) \text{ \AA}$ |
| $j = 1.761(2) \text{ \AA}$ | $j' = 1.768(3) \text{ \AA}$ |

Side view

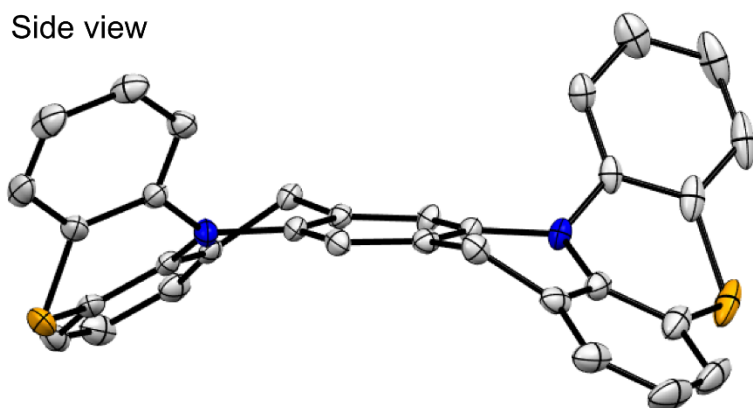

|                                |
|--------------------------------|
| $\varphi_{A-C} = 60.9^\circ$   |
| $\varphi_{A-B} = 33.6^\circ$   |
| $\varphi_{B-C} = 35.4^\circ$   |
| $\varphi_{A'-C'} = 63.1^\circ$ |
| $\varphi_{A'-B'} = 34.5^\circ$ |
| $\varphi_{B'-C'} = 36.8^\circ$ |

**Figure S14.** X-ray crystal structure of *rac*-4. Displacement ellipsoids are shown at the 50% probability level. Hydrogen atoms and Me groups are omitted for clarity. In the crystal of *rac*-4, two enantiomers, i.e., (*P,P*)-4 and (*M,M*)-4, existed in the ratio of 1:1. One of the two enantiomeric molecules is shown.

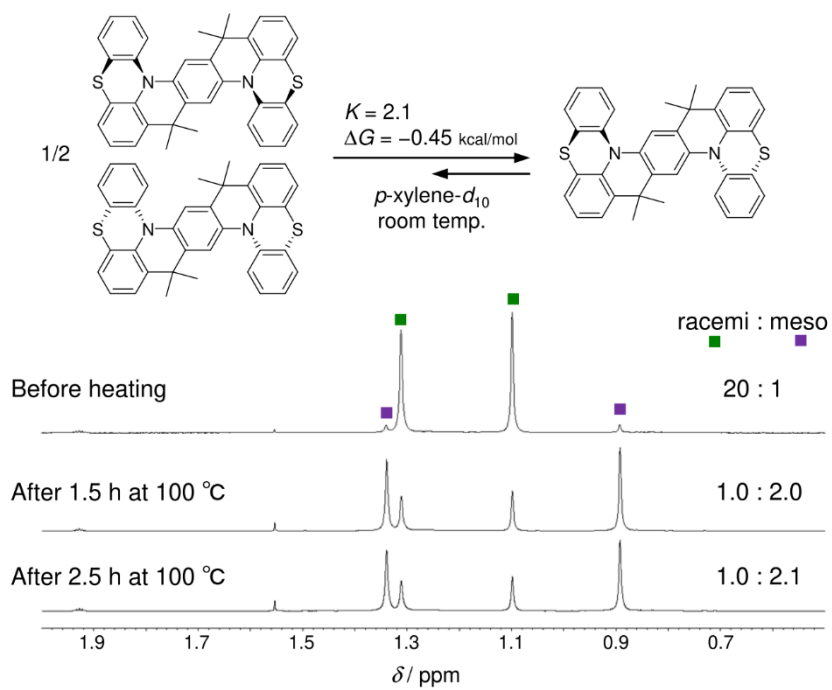

**Figure S15.** <sup>1</sup>H NMR spectra of **4**, which was heated at 100 °C, measured at room temperature in *p*-xylene-*d*<sub>10</sub>.

**Kinetic studies:** A solution of *p*-xylene-*d*<sub>10</sub> solution containing a large excess of *rac*-4 was placed in a NMR tube and equilibrated at the corresponding temperature within an oil bath, and a timer was started. For each data point, the tube was taken out of the oil bath, the timer was stopped, and a <sup>1</sup>H NMR spectrum was recorded at 20 °C, after which the heating and the timer were resumed. Rate constants *k* at the corresponding temperature *T* were determined by monitoring the concentrations of disappearing *rac*-4 and forming *meso*-4 using <sup>1</sup>H NMR spectroscopy.

$$C_{(MMPP)} = C_{(M,M)} + C_{(P,P)}$$

$$\Rightarrow -\frac{dC_{(MMPP)}}{dt} = (k_3 + k_4) C_{(MMPP)} - 2(k_1 + k_2) C_{(M,P)}$$

$$C_{(MMPP)} > C_{(M,P)}$$

$$(k_3 + k_4) C_{(MMPP)} > 2(k_1 + k_2) C_{(M,P)}$$

$$\Rightarrow -\frac{dC_{(MMPP)}}{dt} = (k_3 + k_4) C_{(MMPP)}$$

$C_{(MMPP(0))}$  is the sum of the initial concentrations of  $C_{(MM)}$  and  $C_{(PP)}$ :

$$\Rightarrow \int_{C_{(MMPP(0))}}^{C_{(MMPP)}} -\frac{dC_{(MP)}}{(k_3 + k_4) C_{(MMPP)}} = \int_0^t dt$$

$$\Rightarrow \ln \frac{C_{(MMPP(0))}}{C_{(MMPP)}} = (k_3 + k_4)t$$

$$\Rightarrow \ln C_{(MMPP(0))} = \ln C_{(MMPP)} - (k_3 + k_4)t$$

According to the theoretical calculations,  $k_3$  and  $k_4$  are regard to be nearly equal. The rate constant  $k$  for isomerization from the racemic form to the meso form can be deduced from the following equation.

$$k = \frac{k_3 + k_4}{2}$$

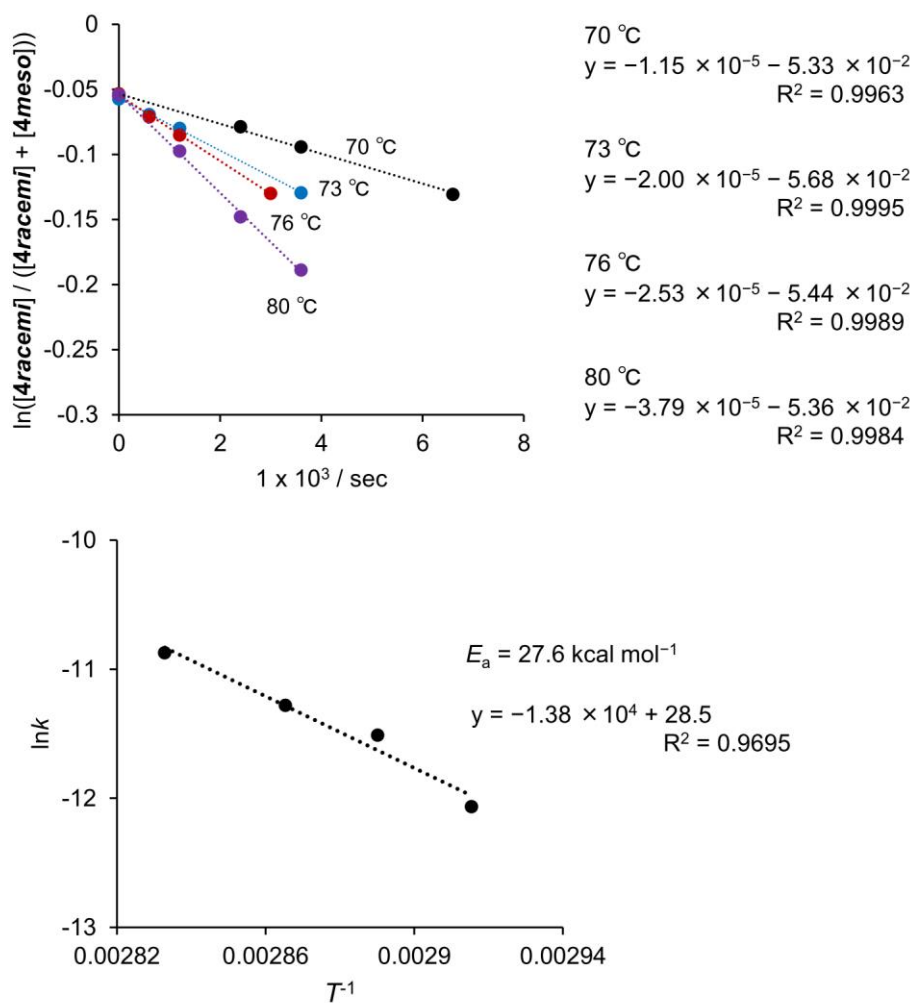

**Figure S16.** Isomerization kinetics from *rac*-4 to *meso*-4 in *p*-xylene-*d*<sub>10</sub>. First-order plots (top) and Arrhenius plots (bottom).

**Table S3.** Isomerization Kinetics Data from *rac*-4 to *meso*-4 in *p*-xylene-*d*<sub>10</sub>

| Temp. [°C] | $k \times 10^5$ [sec <sup>-1</sup> ] | lnk   |
|------------|--------------------------------------|-------|
| 70         | 0.576                                | -17.9 |
| 73         | 1.00                                 | -17.3 |
| 76         | 1.26                                 | -17.1 |
| 80         | 1.89                                 | -16.7 |

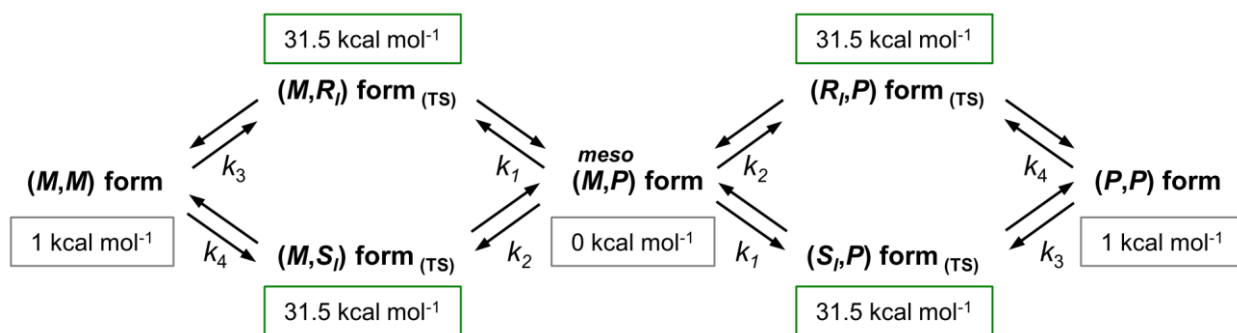

**Figure S20.** Potential energy diagram for the isomerization of **4** calculated at the  $\omega$ B97XD/6-311+G(d,p) level of theory. The selected optimized structures are shown in Figure S21.

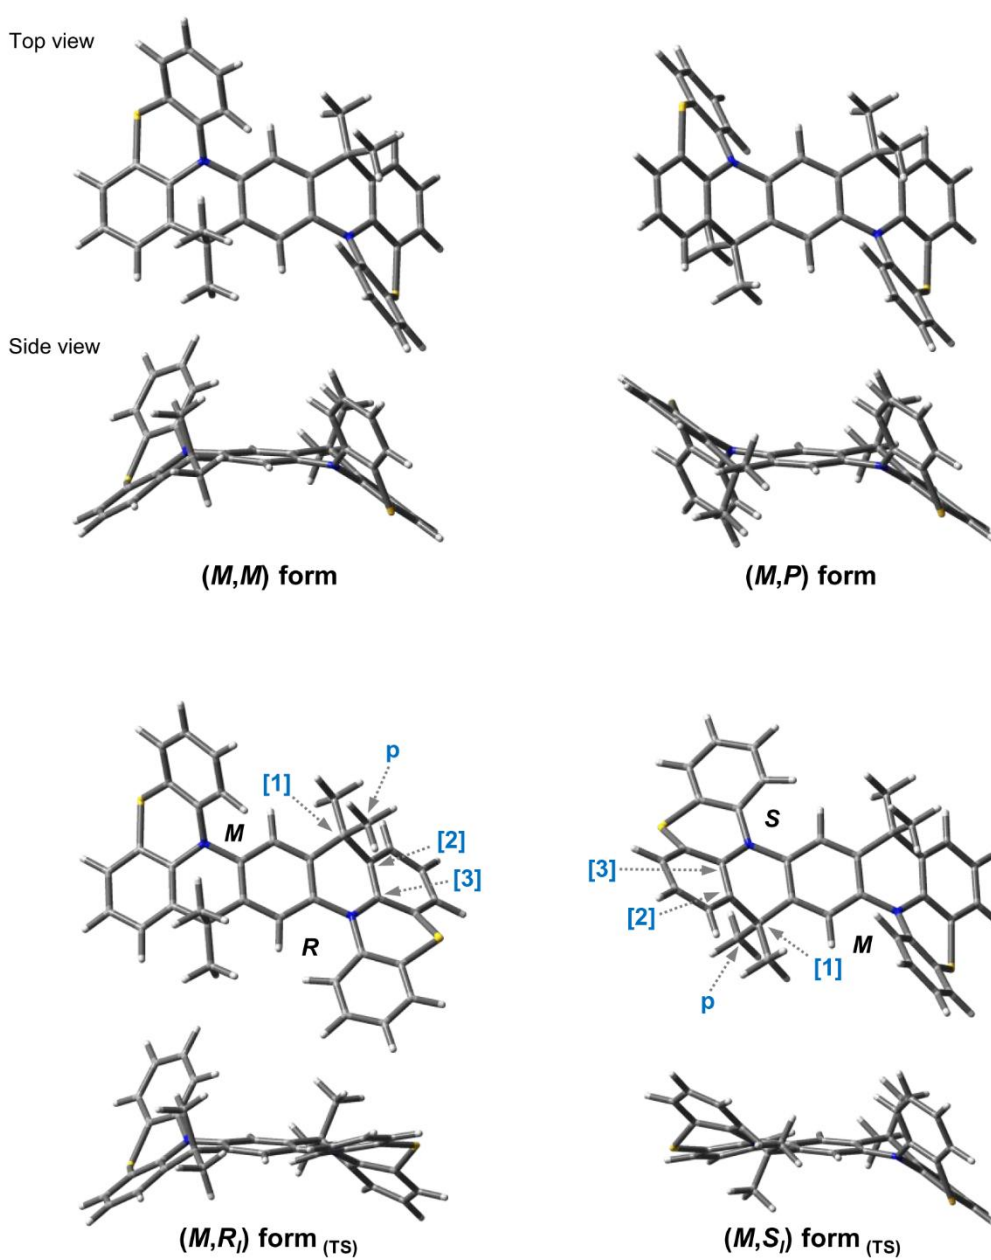

**Figure S21.** Optimized structures of **4** calculated at the  $\omega$ B97XD/6-311+G(d,p) level of theory.

**Optical resolution:** The racemic mixture was separated into enantiomers by using a chiral HPLC method on a chiral stationary phase (Chiralpak IA,  $\phi = 20$  mm,  $L = 250$  mm) with the elution of  $\text{CH}_2\text{Cl}_2$ -hexane ( $v/v = 1:4$ ). After three cycles, three peaks of frac.1 (black label in Figure S15), frac.2 (red label), and frac.3 (blue label) were collected. From the NMR measurements, frac.1 was determined as *meso*-4 and frac.2 and frac.3 were enantiomers of 4. The absolute configuration of these fractions was determined by the comparison of experimental CD spectra and simulated optical rotation obtained from TD-DFT calculations. As a result, frac. 2 (faster) and frac. 3 (slower) were determined to be (*P,P*)-4 and (*M,M*)-4, respectively.

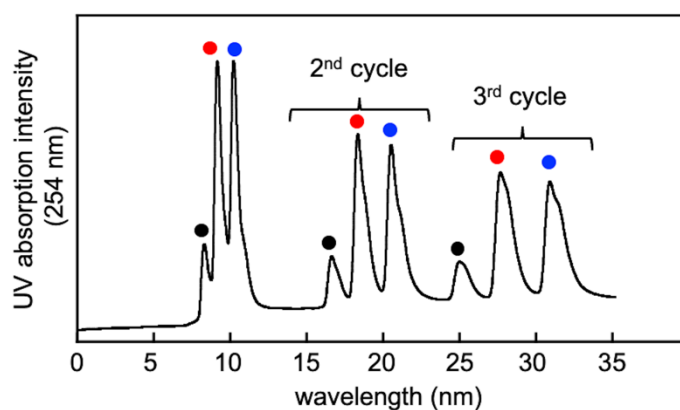

**Figure S22.** Chromatogram for the resolution of *rac*-4 using UV (254 nm) detector.

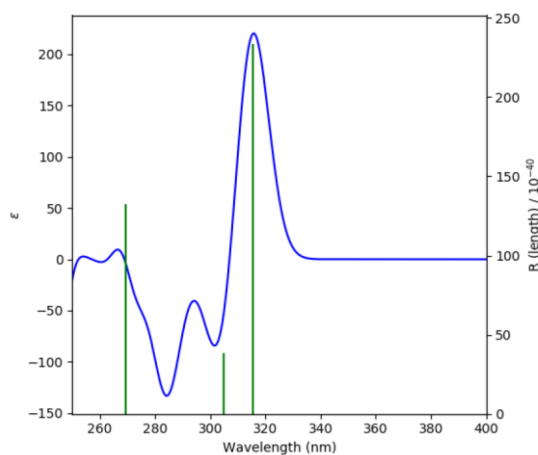

**Figure S23.** Results of TD-DFT calculations for (*M,M*)-4 calculated at the TD-CAM-B3LYP/def2TZVP// $\omega$ B97XD/6-311+G(d,p) level of theory.

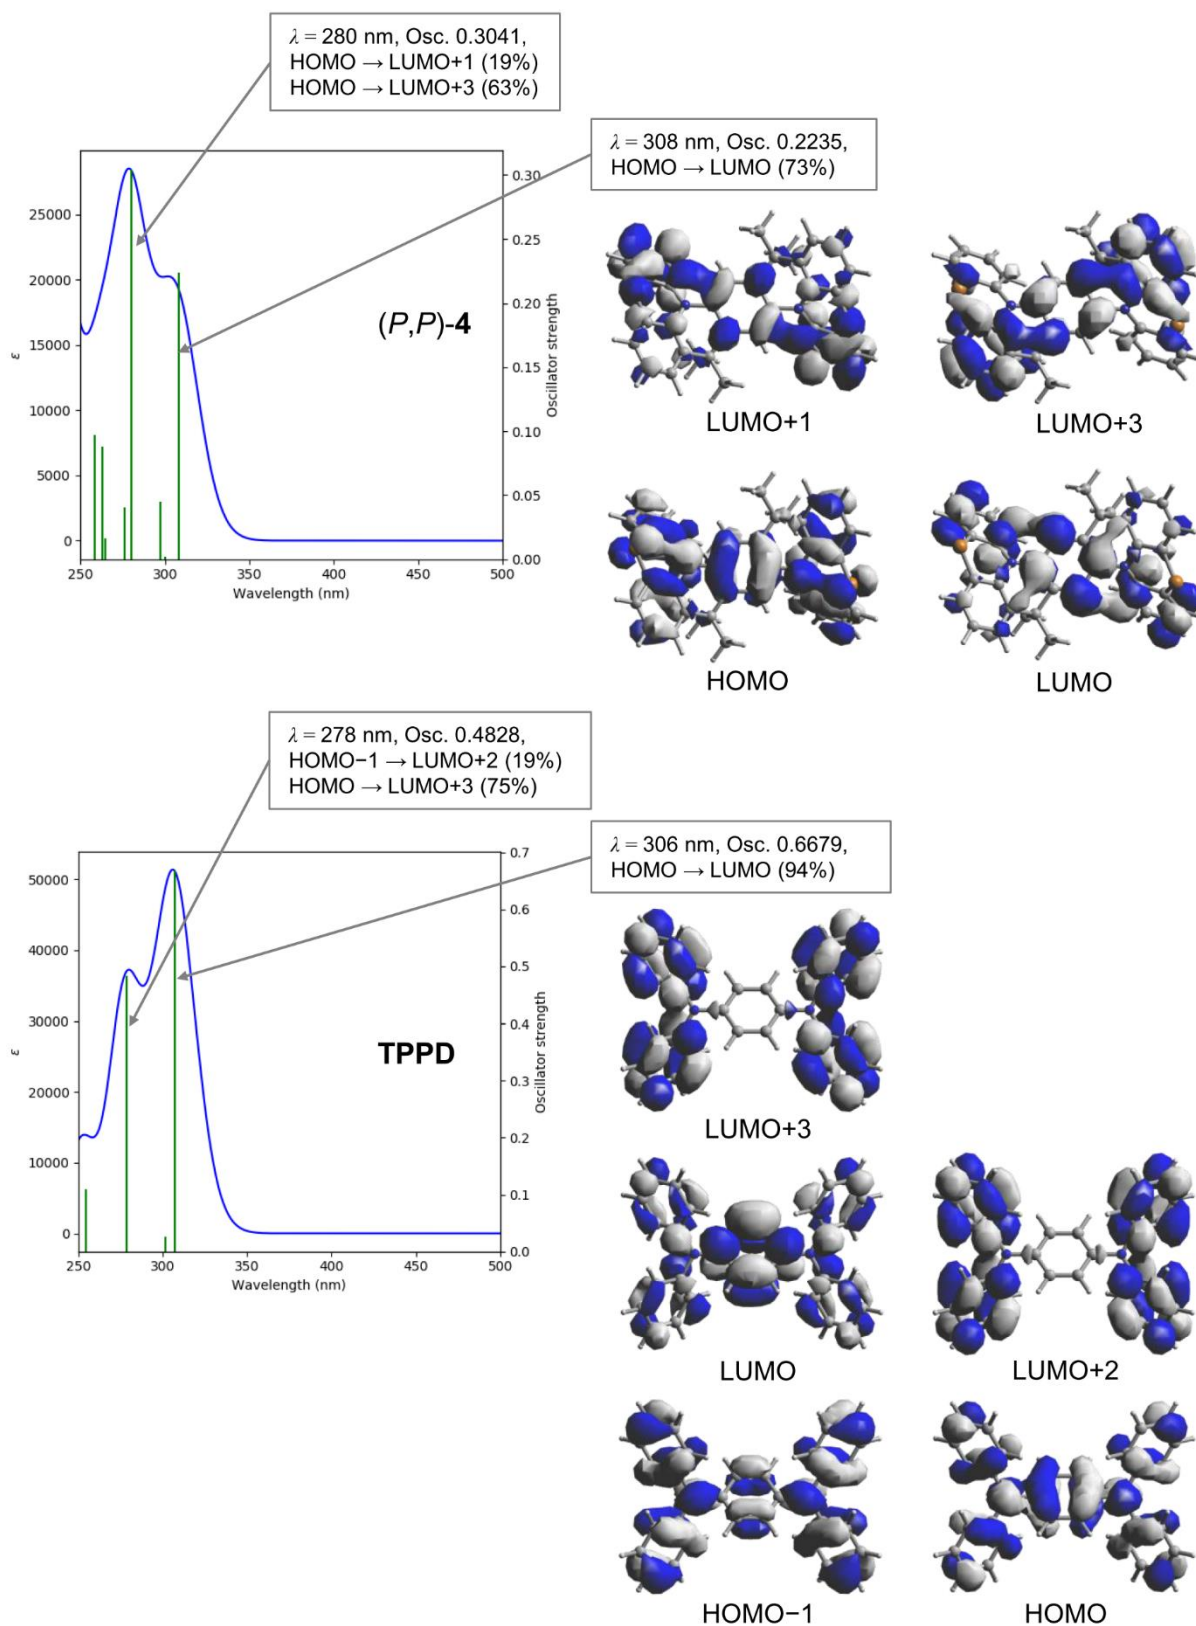

**Figure S24.** Results of TD-DFT calculations for *(P,P)*-4 and TPPD calculated at the TD-M06-2X/6-31G(d)//M06-2X/6-31G(d) level of theory.



**Table S4.** Calculated Total Energies of Triplet and Singlet States, and the Intermolecular Exchange Interactions ( $J_{\text{inter\_calc}}/k_B$ ) for the Dication *meso-4*<sup>2+</sup> <sup>a</sup>

| Spin State     | $E$ [au]      | $\langle S^2 \rangle$ | $2J_{\text{inter\_calc}}/k_B$ [K] |
|----------------|---------------|-----------------------|-----------------------------------|
| HS ( $S = 1$ ) | -2294.1210926 | 2.012243              | -1413.1                           |
| LS ( $S = 0$ ) | -2294.1235969 | 0.893026              |                                   |

<sup>a</sup> The total energies were calculated by using density functional theory at the UB3LYP level of theory with 6-31G(d,p) basis set for C, H, N, S.<sup>[1]</sup> The total energy calculated using UHF-SCF procedure involving spin contamination due to the higher spin states. In order to estimate the exchange interaction, a compensation equation was used,  $J_{\text{inter\_calc}} = ({}^{\text{LS}}E - {}^{\text{HS}}E) / (\langle {}^{\text{HS}}S^2 \rangle - \langle {}^{\text{LS}}S^2 \rangle)$ .<sup>[10]</sup>

## 4. <sup>1</sup>H and <sup>13</sup>C NMR data

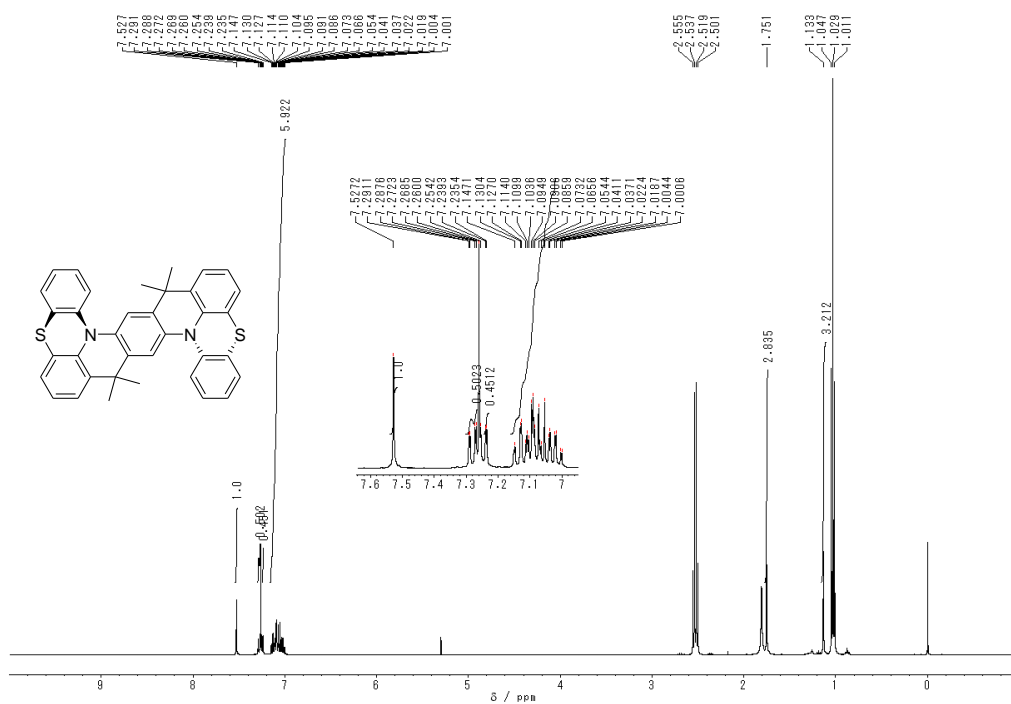

Figure S25. <sup>1</sup>H NMR spectrum of *meso-4* in CDCl<sub>3</sub>/Et<sub>3</sub>N solution (400 MHz).

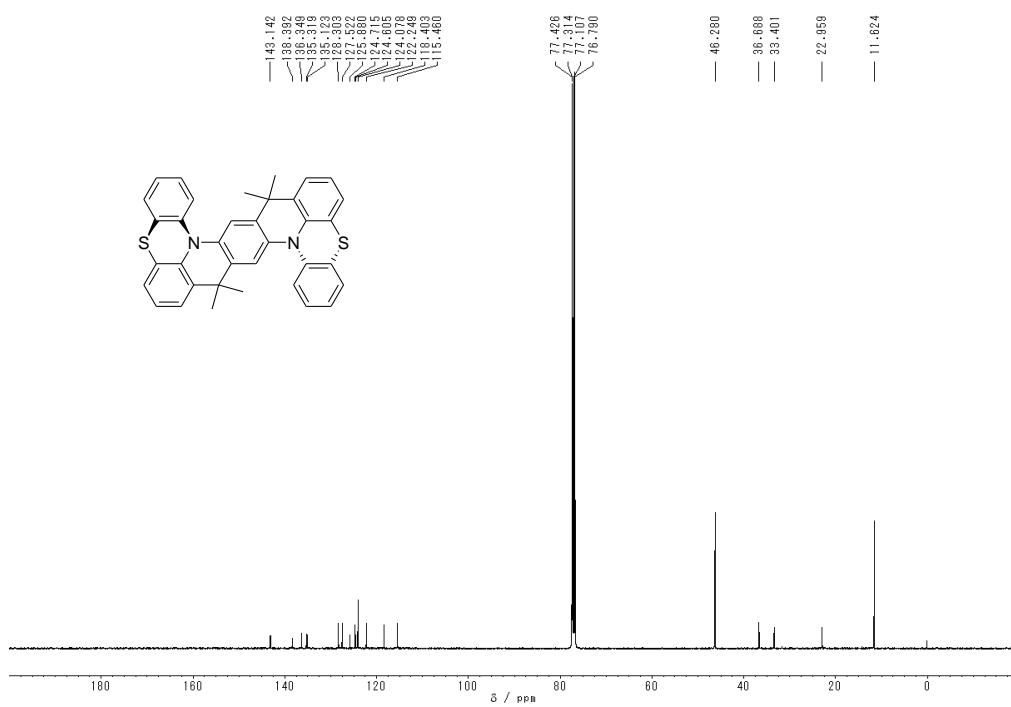

Figure S26. <sup>13</sup>C NMR spectrum of *meso-4* in CDCl<sub>3</sub>/Et<sub>3</sub>N solution (100 MHz).

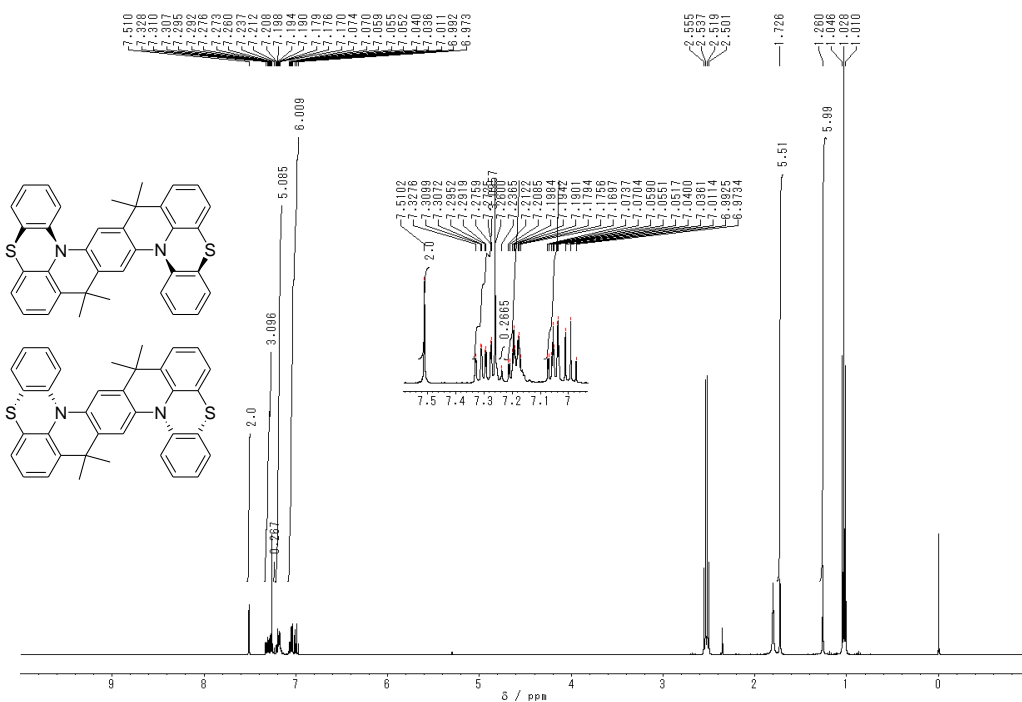

**Figure S27.**  $^1\text{H}$  NMR spectrum of *rac-4* in  $\text{CDCl}_3/\text{Et}_3\text{N}$  solution (400 MHz).

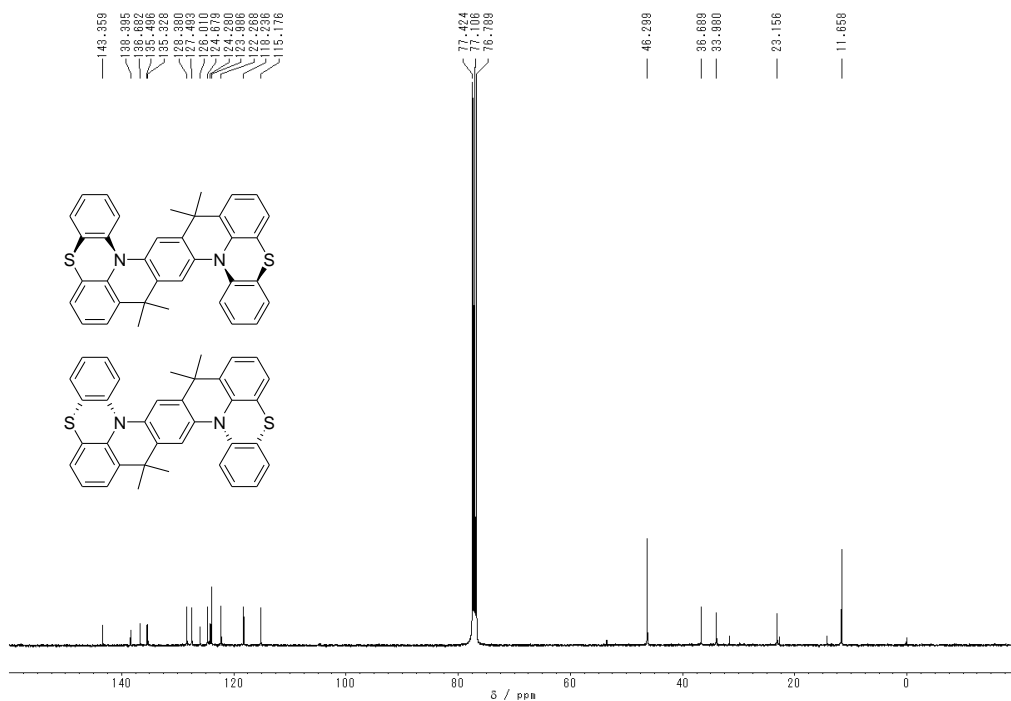

**Figure S28.**  $^{13}\text{C}$  NMR spectrum of *rac-4* in  $\text{CDCl}_3/\text{Et}_3\text{N}$  solution (100 MHz).

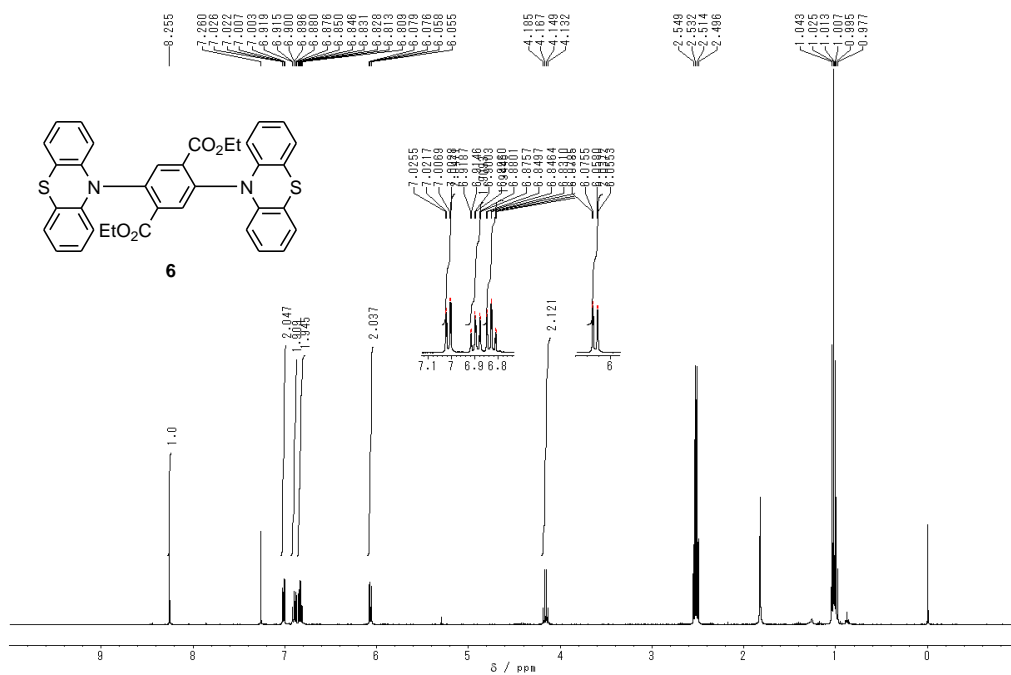

Figure S29. <sup>1</sup>H NMR spectrum of **6** in CDCl<sub>3</sub>/Et<sub>3</sub>N solution (400 MHz).

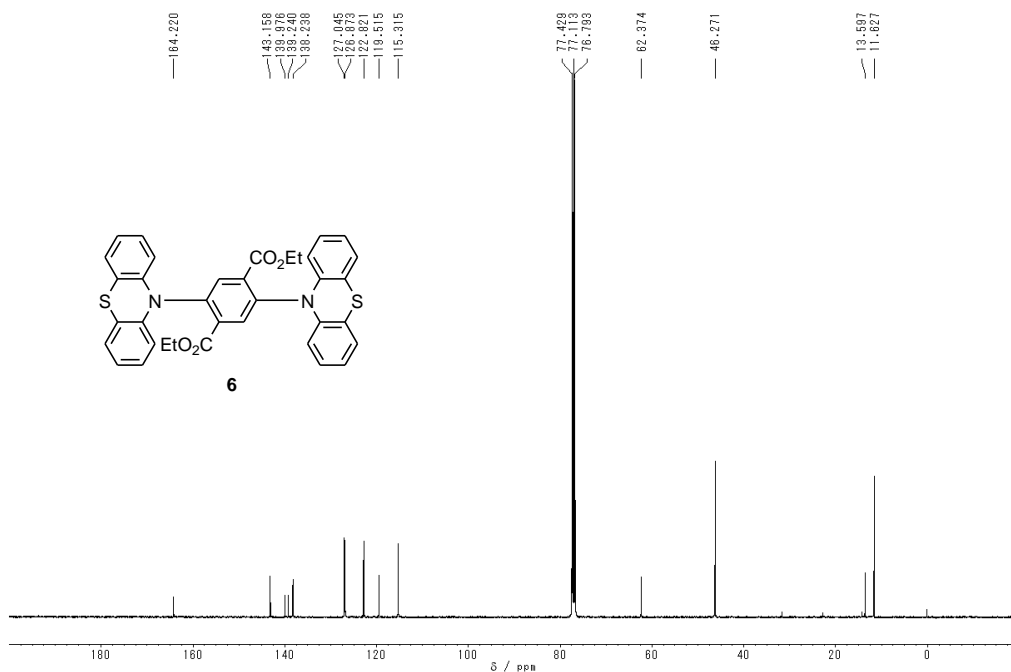

Figure S30. <sup>13</sup>C NMR spectrum of **6** in CDCl<sub>3</sub>/Et<sub>3</sub>N solution (100 MHz).

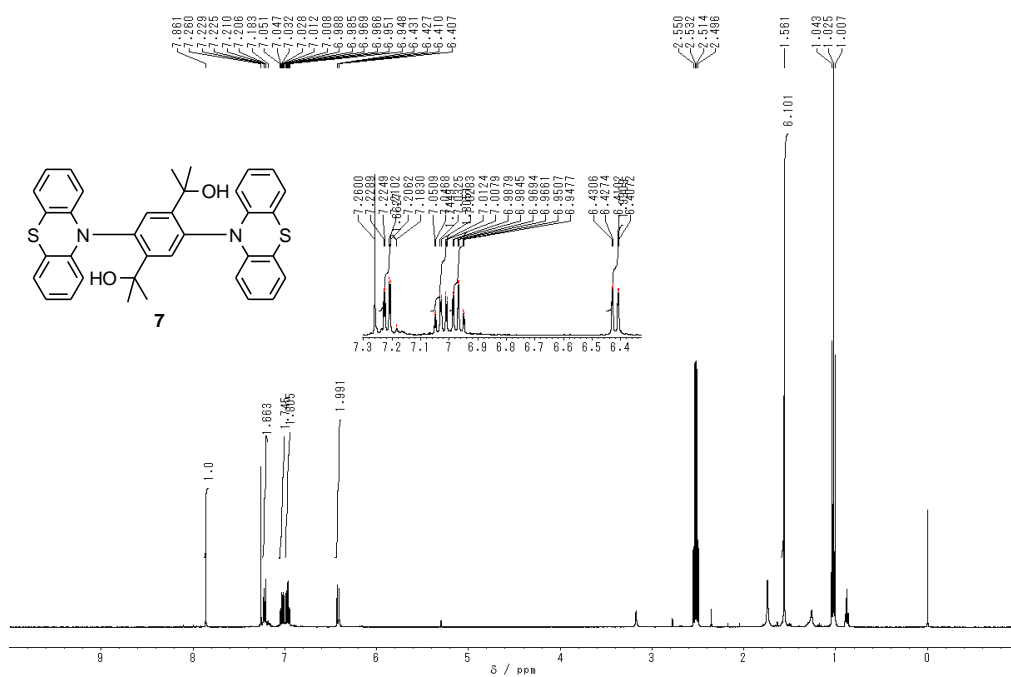

**Figure S31.** <sup>1</sup>H NMR spectrum of 7 in CDCl<sub>3</sub>/Et<sub>3</sub>N solution (400 MHz).

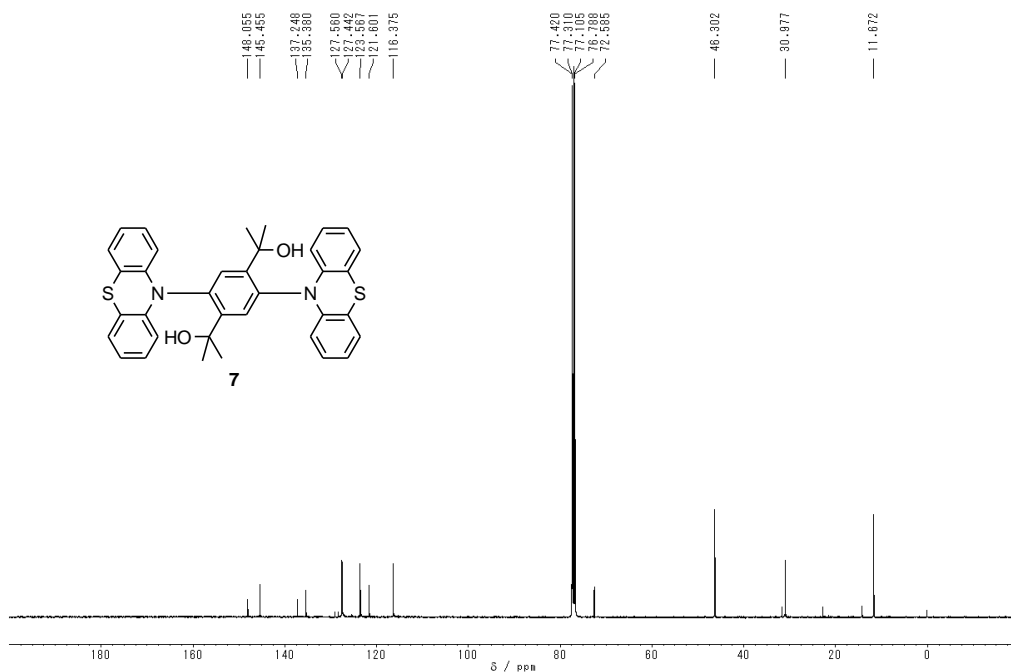

**Figure S32.** <sup>13</sup>C NMR spectrum of 7 in CDCl<sub>3</sub>/Et<sub>3</sub>N solution (100 MHz).

## 5. Tables of cartesian coordinates of molecules

Cartesian Coordinates of (*M,M*)-4 Optimized at the  $\omega$ B97XD/6-311+G(d,p) Level of Theory

| Center<br>Number | Atomic<br>Number | Atomic<br>Type | Coordinates (Angstroms) |           |           |
|------------------|------------------|----------------|-------------------------|-----------|-----------|
|                  |                  |                | X                       | Y         | Z         |
| 1                | 7                | 0              | -2.423764               | 1.383803  | -0.020965 |
| 2                | 6                | 0              | -3.488904               | 0.748952  | -0.688017 |
| 3                | 6                | 0              | -4.443244               | 1.516146  | -1.354571 |
| 4                | 6                | 0              | -3.566464               | -0.647056 | -0.686696 |
| 5                | 6                | 0              | -5.482155               | 0.897639  | -2.037439 |
| 6                | 6                | 0              | -4.582755               | -1.249983 | -1.423041 |
| 7                | 6                | 0              | -5.533821               | -0.488184 | -2.090700 |
| 8                | 1                | 0              | -6.229987               | 1.500267  | -2.539882 |
| 9                | 1                | 0              | -4.652212               | -2.329316 | -1.466596 |
| 10               | 1                | 0              | -6.325732               | -0.977311 | -2.645541 |
| 11               | 6                | 0              | -2.676703               | 2.547443  | 0.731219  |
| 12               | 6                | 0              | -2.093983               | 2.749825  | 1.982803  |
| 13               | 6                | 0              | -3.566464               | 3.504170  | 0.233084  |
| 14               | 6                | 0              | -2.367139               | 3.902848  | 2.704933  |
| 15               | 1                | 0              | -1.416464               | 2.002541  | 2.378710  |
| 16               | 6                | 0              | -3.866389               | 4.638620  | 0.978926  |
| 17               | 6                | 0              | -3.253388               | 4.850760  | 2.206854  |
| 18               | 1                | 0              | -1.895857               | 4.051432  | 3.669710  |
| 19               | 1                | 0              | -4.573188               | 5.360606  | 0.585664  |
| 20               | 1                | 0              | -3.476248               | 5.746267  | 2.774536  |
| 21               | 6                | 0              | -1.200410               | 0.685464  | 0.057128  |
| 22               | 6                | 0              | 0.004740                | 1.380049  | 0.039413  |
| 23               | 6                | 0              | -1.219875               | -0.711193 | 0.077854  |
| 24               | 6                | 0              | 1.219875                | 0.711193  | 0.077854  |
| 25               | 1                | 0              | -0.027216               | 2.461077  | 0.001939  |
| 26               | 6                | 0              | -0.004740               | -1.380049 | 0.039413  |
| 27               | 6                | 0              | 1.200410                | -0.685464 | 0.057128  |
| 28               | 1                | 0              | 0.027216                | -2.461077 | 0.001939  |
| 29               | 6                | 0              | -2.571658               | -1.410388 | 0.185735  |
| 30               | 16               | 0              | -4.259182               | 3.281626  | -1.386275 |
| 31               | 6                | 0              | -2.488999               | -2.891602 | -0.186561 |
| 32               | 1                | 0              | -2.158276               | -3.033350 | -1.218600 |
| 33               | 1                | 0              | -1.796560               | -3.415683 | 0.475685  |
| 34               | 1                | 0              | -3.460814               | -3.373623 | -0.062448 |
| 35               | 6                | 0              | -3.047924               | -1.300330 | 1.655297  |
| 36               | 1                | 0              | -4.031230               | -1.765548 | 1.767423  |
| 37               | 1                | 0              | -2.340080               | -1.808946 | 2.316331  |
| 38               | 1                | 0              | -3.127097               | -0.258160 | 1.972905  |
| 39               | 7                | 0              | 2.423764                | -1.383803 | -0.020965 |
| 40               | 6                | 0              | 3.488904                | -0.748952 | -0.688017 |
| 41               | 6                | 0              | 2.676703                | -2.547443 | 0.731219  |
| 42               | 6                | 0              | 4.443244                | -1.516146 | -1.354571 |
| 43               | 6                | 0              | 3.566464                | 0.647056  | -0.686696 |
| 44               | 6                | 0              | 2.093983                | -2.749825 | 1.982803  |
| 45               | 6                | 0              | 3.566464                | -3.504170 | 0.233084  |
| 46               | 6                | 0              | 5.482155                | -0.897639 | -2.037439 |
| 47               | 16               | 0              | 4.259182                | -3.281626 | -1.386275 |
| 48               | 6                | 0              | 4.582755                | 1.249983  | -1.423041 |
| 49               | 6                | 0              | 2.571658                | 1.410388  | 0.185735  |

|    |   |   |          |           |           |
|----|---|---|----------|-----------|-----------|
| 50 | 6 | 0 | 2.367139 | -3.902848 | 2.704933  |
| 51 | 1 | 0 | 1.416464 | -2.002541 | 2.378710  |
| 52 | 6 | 0 | 3.866389 | -4.638620 | 0.978926  |
| 53 | 6 | 0 | 5.533821 | 0.488184  | -2.090700 |
| 54 | 1 | 0 | 6.229987 | -1.500267 | -2.539882 |
| 55 | 1 | 0 | 4.652212 | 2.329316  | -1.466596 |
| 56 | 6 | 0 | 2.488999 | 2.891602  | -0.186561 |
| 57 | 6 | 0 | 3.047924 | 1.300330  | 1.655297  |
| 58 | 6 | 0 | 3.253388 | -4.850760 | 2.206854  |
| 59 | 1 | 0 | 1.895857 | -4.051432 | 3.669710  |
| 60 | 1 | 0 | 4.573188 | -5.360606 | 0.585664  |
| 61 | 1 | 0 | 6.325732 | 0.977311  | -2.645541 |
| 62 | 1 | 0 | 2.158276 | 3.033350  | -1.218600 |
| 63 | 1 | 0 | 1.796560 | 3.415683  | 0.475685  |
| 64 | 1 | 0 | 3.460814 | 3.373623  | -0.062448 |
| 65 | 1 | 0 | 4.031230 | 1.765548  | 1.767423  |
| 66 | 1 | 0 | 2.340080 | 1.808946  | 2.316331  |
| 67 | 1 | 0 | 3.127097 | 0.258160  | 1.972905  |
| 68 | 1 | 0 | 3.476248 | -5.746267 | 2.774536  |

-----

Cartesian Coordinates of (*M,P*)-4 (*meso*-4) Optimized at the  $\omega$ B97XD/6-311+G(d,p) Level of Theory

| Center<br>Number | Atomic<br>Number | Atomic<br>Type | Coordinates (Angstroms) |           |           |
|------------------|------------------|----------------|-------------------------|-----------|-----------|
|                  |                  |                | X                       | Y         | Z         |
| 1                | 7                | 0              | -2.789402               | -0.120709 | 0.028271  |
| 2                | 6                | 0              | -3.512035               | -1.280766 | 0.369578  |
| 3                | 6                | 0              | -4.770519               | -1.494936 | -0.200665 |
| 4                | 6                | 0              | -5.522556               | -2.608175 | 0.157416  |
| 5                | 6                | 0              | -3.759647               | -3.330060 | 1.620396  |
| 6                | 6                | 0              | -5.011534               | -3.538176 | 1.053319  |
| 7                | 1                | 0              | -6.504855               | -2.748160 | -0.279601 |
| 8                | 1                | 0              | -3.358693               | -4.042124 | 2.332486  |
| 9                | 1                | 0              | -5.593822               | -4.413917 | 1.313878  |
| 10               | 6                | 0              | -3.472073               | 1.103154  | -0.104203 |
| 11               | 6                | 0              | -2.891495               | 2.272000  | 0.398065  |
| 12               | 6                | 0              | -4.708236               | 1.139650  | -0.748148 |
| 13               | 6                | 0              | -3.548620               | 3.479640  | 0.177242  |
| 14               | 6                | 0              | -5.375229               | 2.346860  | -0.908937 |
| 15               | 6                | 0              | -4.779015               | 3.519716  | -0.467113 |
| 16               | 1                | 0              | -3.111416               | 4.405746  | 0.527728  |
| 17               | 1                | 0              | -6.343596               | 2.366063  | -1.395531 |
| 18               | 1                | 0              | -5.281451               | 4.468505  | -0.614148 |
| 19               | 6                | 0              | -1.379381               | -0.076107 | 0.049808  |
| 20               | 6                | 0              | -0.637723               | -1.120009 | -0.493404 |
| 21               | 6                | 0              | -0.747324               | 1.062981  | 0.553889  |
| 22               | 6                | 0              | 0.747325                | -1.062978 | -0.553906 |
| 23               | 1                | 0              | -1.170536               | -1.973208 | -0.892502 |
| 24               | 6                | 0              | 0.637724                | 1.120012  | 0.493386  |
| 25               | 6                | 0              | 1.379382                | 0.076110  | -0.049825 |
| 26               | 1                | 0              | 1.170537                | 1.973212  | 0.892483  |
| 27               | 6                | 0              | -1.612042               | 2.129158  | 1.220560  |
| 28               | 16               | 0              | -5.367797               | -0.361133 | -1.429762 |
| 29               | 6                | 0              | -2.006970               | 1.616972  | 2.627499  |
| 30               | 1                | 0              | -2.545297               | 0.668214  | 2.570317  |

|    |    |   |           |           |           |
|----|----|---|-----------|-----------|-----------|
| 31 | 1  | 0 | -1.110713 | 1.467121  | 3.236057  |
| 32 | 1  | 0 | -2.653726 | 2.345500  | 3.124335  |
| 33 | 6  | 0 | -0.871668 | 3.458421  | 1.377530  |
| 34 | 1  | 0 | -1.503287 | 4.193097  | 1.880973  |
| 35 | 1  | 0 | 0.014789  | 3.333629  | 2.002625  |
| 36 | 1  | 0 | -0.561469 | 3.867249  | 0.412349  |
| 37 | 7  | 0 | 2.789403  | 0.120709  | -0.028288 |
| 38 | 6  | 0 | 3.472069  | -1.103156 | 0.104197  |
| 39 | 6  | 0 | 3.512040  | 1.280766  | -0.369578 |
| 40 | 6  | 0 | 4.708226  | -1.139656 | 0.748154  |
| 41 | 6  | 0 | 2.891491  | -2.272001 | -0.398073 |
| 42 | 6  | 0 | 3.021458  | 2.200502  | -1.297051 |
| 43 | 6  | 0 | 4.770521  | 1.494932  | 0.200676  |
| 44 | 6  | 0 | 5.375212  | -2.346869 | 0.908951  |
| 45 | 16 | 0 | 5.367789  | 0.361123  | 1.429773  |
| 46 | 6  | 0 | 3.548607  | -3.479643 | -0.177242 |
| 47 | 6  | 0 | 1.612044  | -2.129154 | -1.220577 |
| 48 | 6  | 0 | 3.759664  | 3.330070  | -1.620378 |
| 49 | 1  | 0 | 2.053180  | 2.029597  | -1.752393 |
| 50 | 6  | 0 | 5.522561  | 2.608172  | -0.157391 |
| 51 | 6  | 0 | 4.778997  | -3.519723 | 0.467125  |
| 52 | 1  | 0 | 6.343574  | -2.366075 | 1.395554  |
| 53 | 1  | 0 | 3.111401  | -4.405748 | -0.527728 |
| 54 | 6  | 0 | 0.871668  | -3.458414 | -1.377559 |
| 55 | 6  | 0 | 2.006983  | -1.616963 | -2.627511 |
| 56 | 6  | 0 | 5.011547  | 3.538180  | -1.053291 |
| 57 | 1  | 0 | 3.358716  | 4.042140  | -2.332466 |
| 58 | 1  | 0 | 6.504857  | 2.748153  | 0.279634  |
| 59 | 1  | 0 | 5.281427  | -4.468515 | 0.614167  |
| 60 | 1  | 0 | 0.561479  | -3.867256 | -0.412381 |
| 61 | 1  | 0 | -0.014795 | -3.333612 | -2.002643 |
| 62 | 1  | 0 | 1.503282  | -4.193083 | -1.881019 |
| 63 | 1  | 0 | 2.653732  | -2.345495 | -3.124350 |
| 64 | 1  | 0 | 1.110730  | -1.467096 | -3.236070 |
| 65 | 1  | 0 | 2.545322  | -0.668211 | -2.570320 |
| 66 | 1  | 0 | 5.593839  | 4.413923  | -1.313839 |
| 67 | 6  | 0 | -3.021444 | -2.200494 | 1.297055  |
| 68 | 1  | 0 | -2.053162 | -2.029585 | 1.752388  |

-----

Cartesian Coordinates of  $(M,R_I)$  form<sub>(TS)</sub> of **4** Optimized at the  $\omega$ B97XD/6-311+G(d,p) Level of Theory

| Center<br>Number | Atomic<br>Number | Atomic<br>Type | Coordinates (Angstroms) |           |           |
|------------------|------------------|----------------|-------------------------|-----------|-----------|
|                  |                  |                | X                       | Y         | Z         |
| 1                | 6                | 0              | -1.383759               | 0.121478  | 0.015819  |
| 2                | 6                | 0              | -0.558403               | 1.251088  | 0.000792  |
| 3                | 6                | 0              | -0.709679               | -1.122153 | -0.008988 |
| 4                | 6                | 0              | 0.829540                | 1.210335  | 0.068943  |
| 5                | 1                | 0              | -0.956004               | 2.231019  | -0.080649 |
| 6                | 6                | 0              | 0.674990                | -1.165906 | 0.001834  |
| 7                | 6                | 0              | 1.455807                | -0.023781 | 0.071183  |
| 8                | 1                | 0              | 1.178995                | -2.120276 | -0.049041 |
| 9                | 7                | 0              | 2.860908                | -0.097386 | 0.042134  |
| 10               | 6                | 0              | 3.544466                | 0.958959  | -0.589729 |
| 11               | 6                | 0              | 3.580563                | -1.032888 | 0.811151  |



|    |    |   |           |           |           |
|----|----|---|-----------|-----------|-----------|
| 12 | 6  | 0 | 4.772234  | 0.716903  | -1.204848 |
| 13 | 6  | 0 | 2.970938  | 2.234722  | -0.613283 |
| 14 | 6  | 0 | 3.094850  | -1.499058 | 2.033140  |
| 15 | 6  | 0 | 4.828962  | -1.473532 | 0.361972  |
| 16 | 6  | 0 | 5.440767  | 1.744767  | -1.856393 |
| 17 | 16 | 0 | 5.418723  | -0.936212 | -1.223600 |
| 18 | 6  | 0 | 3.629891  | 3.237670  | -1.319755 |
| 19 | 6  | 0 | 1.698602  | 2.458649  | 0.203934  |
| 20 | 6  | 0 | 3.827188  | -2.416211 | 2.773684  |
| 21 | 1  | 0 | 2.135085  | -1.146227 | 2.391786  |
| 22 | 6  | 0 | 5.575713  | -2.361742 | 1.127745  |
| 23 | 6  | 0 | 4.853464  | 2.999635  | -1.933247 |
| 24 | 1  | 0 | 6.402730  | 1.553411  | -2.317747 |
| 25 | 1  | 0 | 3.198780  | 4.228560  | -1.382044 |
| 26 | 6  | 0 | 0.964147  | 3.736951  | -0.205250 |
| 27 | 6  | 0 | 2.110031  | 2.587168  | 1.691682  |
| 28 | 6  | 0 | 5.068991  | -2.850287 | 2.325024  |
| 29 | 1  | 0 | 3.430028  | -2.779491 | 3.714503  |
| 30 | 1  | 0 | 6.550341  | -2.678368 | 0.773747  |
| 31 | 1  | 0 | 5.356473  | 3.799023  | -2.464399 |
| 32 | 1  | 0 | 0.635866  | 3.703968  | -1.247531 |
| 33 | 1  | 0 | 0.093689  | 3.901758  | 0.434746  |
| 34 | 1  | 0 | 1.607238  | 4.608789  | -0.071518 |
| 35 | 1  | 0 | 2.761696  | 3.454727  | 1.828482  |
| 36 | 1  | 0 | 1.220867  | 2.709816  | 2.316703  |
| 37 | 1  | 0 | 2.649088  | 1.700412  | 2.032902  |
| 38 | 1  | 0 | 5.647042  | -3.557505 | 2.907727  |
| 39 | 7  | 0 | -2.832104 | 0.141826  | 0.011265  |
| 40 | 6  | 0 | -3.447902 | -0.989965 | -0.596333 |
| 41 | 6  | 0 | -3.650397 | 1.289237  | 0.336440  |
| 42 | 6  | 0 | -4.832892 | -1.086614 | -0.807848 |
| 43 | 6  | 0 | -2.706644 | -2.133100 | -0.927402 |
| 44 | 6  | 0 | -3.195252 | 2.616487  | 0.404999  |
| 45 | 6  | 0 | -5.031690 | 1.155773  | 0.606695  |
| 46 | 6  | 0 | -5.362700 | -2.011314 | -1.695620 |
| 47 | 16 | 0 | -5.927476 | -0.334926 | 0.343100  |
| 48 | 6  | 0 | -3.235536 | -3.062469 | -1.823764 |
| 49 | 6  | 0 | -1.491839 | -2.412926 | -0.068100 |
| 50 | 6  | 0 | -3.968486 | 3.674245  | 0.867718  |
| 51 | 1  | 0 | -2.228213 | 2.907350  | 0.068405  |
| 52 | 6  | 0 | -5.811065 | 2.217506  | 1.056110  |
| 53 | 6  | 0 | -4.537105 | -2.959412 | -2.283303 |
| 54 | 1  | 0 | -6.431812 | -2.012411 | -1.874919 |
| 55 | 1  | 0 | -2.627565 | -3.899360 | -2.140144 |
| 56 | 6  | 0 | -1.993169 | -2.757445 | 1.357018  |
| 57 | 6  | 0 | -0.675088 | -3.602190 | -0.577945 |
| 58 | 6  | 0 | -5.282923 | 3.481107  | 1.241046  |
| 59 | 1  | 0 | -3.518905 | 4.659637  | 0.908003  |
| 60 | 1  | 0 | -6.863351 | 2.033366  | 1.243724  |
| 61 | 1  | 0 | -4.929946 | -3.665734 | -3.004200 |
| 62 | 1  | 0 | -2.568407 | -1.935540 | 1.788999  |
| 63 | 1  | 0 | -1.138928 | -2.958526 | 2.010322  |
| 64 | 1  | 0 | -2.632440 | -3.644204 | 1.327642  |
| 65 | 1  | 0 | -1.301793 | -4.495176 | -0.617624 |
| 66 | 1  | 0 | 0.143783  | -3.834190 | 0.105423  |
| 67 | 1  | 0 | -0.259511 | -3.420533 | -1.572356 |
| 68 | 1  | 0 | -5.896079 | 4.292721  | 1.612552  |

-----  
 Cartesian Coordinates of ( $M,S_i$ ) form (TS) of **4** Optimized at the  $\omega$ B97XD/6-311+G(d,p) Level of Theory

| Center<br>Number | Atomic<br>Number | Atomic<br>Type | Coordinates (Angstroms) |           |           |
|------------------|------------------|----------------|-------------------------|-----------|-----------|
|                  |                  |                | X                       | Y         | Z         |
| 1                | 7                | 0              | -2.829254               | 0.175122  | -0.050366 |
| 2                | 6                | 0              | -3.480360               | -1.081909 | 0.101079  |
| 3                | 6                | 0              | -4.875689               | -1.214673 | 0.191269  |
| 4                | 6                | 0              | -2.761955               | -2.285695 | 0.062409  |
| 5                | 6                | 0              | -5.458539               | -2.373600 | 0.681920  |
| 6                | 6                | 0              | -3.344476               | -3.451804 | 0.560823  |
| 7                | 6                | 0              | -4.670421               | -3.482414 | 0.956914  |
| 8                | 1                | 0              | -6.536375               | -2.412368 | 0.790952  |
| 9                | 1                | 0              | -2.758545               | -4.360051 | 0.605300  |
| 10               | 1                | 0              | -5.106244               | -4.382901 | 1.371805  |
| 11               | 6                | 0              | -3.625300               | 1.381927  | 0.001882  |
| 12               | 6                | 0              | -3.164548               | 2.640138  | 0.423473  |
| 13               | 6                | 0              | -4.989362               | 1.379697  | -0.369519 |
| 14               | 6                | 0              | -3.910052               | 3.808289  | 0.320987  |
| 15               | 1                | 0              | -2.214513               | 2.777663  | 0.883468  |
| 16               | 6                | 0              | -5.742223               | 2.546742  | -0.456929 |
| 17               | 6                | 0              | -5.203010               | 3.784231  | -0.160753 |
| 18               | 1                | 0              | -3.456236               | 4.736777  | 0.647557  |
| 19               | 1                | 0              | -6.782770               | 2.461029  | -0.750612 |
| 20               | 1                | 0              | -5.793745               | 4.686890  | -0.255379 |
| 21               | 6                | 0              | -1.382973               | 0.125827  | 0.010527  |
| 22               | 6                | 0              | -0.554928               | 1.164875  | 0.450408  |
| 23               | 6                | 0              | -0.715999               | -1.066382 | -0.352996 |
| 24               | 6                | 0              | 0.832531                | 1.105518  | 0.478721  |
| 25               | 1                | 0              | -0.953050               | 2.068373  | 0.838129  |
| 26               | 6                | 0              | 0.668966                | -1.122938 | -0.345547 |
| 27               | 6                | 0              | 1.456121                | -0.053466 | 0.047156  |
| 28               | 1                | 0              | 1.164137                | -2.027263 | -0.668530 |
| 29               | 6                | 0              | -1.502530               | -2.284409 | -0.778194 |
| 30               | 16               | 0              | -5.896968               | -0.091754 | -0.694430 |
| 31               | 6                | 0              | -1.925738               | -2.120076 | -2.259222 |
| 32               | 1                | 0              | -2.477857               | -1.190773 | -2.416097 |
| 33               | 1                | 0              | -1.038083               | -2.102126 | -2.898055 |
| 34               | 1                | 0              | -2.565019               | -2.953662 | -2.563176 |
| 35               | 6                | 0              | -0.715342               | -3.590980 | -0.653759 |
| 36               | 1                | 0              | -1.344523               | -4.435617 | -0.940724 |
| 37               | 1                | 0              | 0.136200                | -3.601497 | -1.335978 |
| 38               | 1                | 0              | -0.348905               | -3.755087 | 0.363063  |
| 39               | 7                | 0              | 2.859529                | -0.103266 | -0.033004 |
| 40               | 6                | 0              | 3.530249                | 1.112637  | -0.267132 |
| 41               | 6                | 0              | 3.599339                | -1.239790 | 0.350661  |
| 42               | 6                | 0              | 4.741852                | 1.109923  | -0.957165 |
| 43               | 6                | 0              | 2.960418                | 2.310933  | 0.175966  |
| 44               | 6                | 0              | 3.148956                | -2.099803 | 1.352598  |
| 45               | 6                | 0              | 4.834992                | -1.487318 | -0.254335 |
| 46               | 6                | 0              | 5.397434                | 2.305398  | -1.219840 |
| 47               | 16               | 0              | 5.382507                | -0.428273 | -1.569631 |
| 48               | 6                | 0              | 3.605003                | 3.502459  | -0.146432 |
| 49               | 6                | 0              | 1.706463                | 2.222224  | 1.046143  |

|    |   |   |          |           |           |
|----|---|---|----------|-----------|-----------|
| 50 | 6 | 0 | 3.901843 | -3.207809 | 1.714636  |
| 51 | 1 | 0 | 2.200084 | -1.900445 | 1.836375  |
| 52 | 6 | 0 | 5.603026 | -2.576932 | 0.140629  |
| 53 | 6 | 0 | 4.812253 | 3.503087  | -0.834063 |
| 54 | 1 | 0 | 6.347226 | 2.294932  | -1.741958 |
| 55 | 1 | 0 | 3.176151 | 4.449249  | 0.155584  |
| 56 | 6 | 0 | 0.968744 | 3.559882  | 1.134997  |
| 57 | 6 | 0 | 2.147159 | 1.810814  | 2.472371  |
| 58 | 6 | 0 | 5.130003 | -3.450684 | 1.110940  |
| 59 | 1 | 0 | 3.531616 | -3.874647 | 2.484756  |
| 60 | 1 | 0 | 6.567738 | -2.743193 | -0.325342 |
| 61 | 1 | 0 | 5.304657 | 4.441411  | -1.060501 |
| 62 | 1 | 0 | 0.614502 | 3.895972  | 0.156985  |
| 63 | 1 | 0 | 0.114107 | 3.484824  | 1.812087  |
| 64 | 1 | 0 | 1.618763 | 4.330097  | 1.554420  |
| 65 | 1 | 0 | 2.801574 | 2.575717  | 2.899782  |
| 66 | 1 | 0 | 1.270688 | 1.695508  | 3.116535  |
| 67 | 1 | 0 | 2.692360 | 0.864350  | 2.463895  |
| 68 | 1 | 0 | 5.724081 | -4.309226 | 1.400480  |

-----

Cartesian Coordinates of (P,P)-4 Optimized at the M06-2X/6-31G(d) Level of Theory

-----

| Center<br>Number | Atomic<br>Number | Atomic<br>Type | Coordinates (Angstroms) |           |           |
|------------------|------------------|----------------|-------------------------|-----------|-----------|
|                  |                  |                | X                       | Y         | Z         |
| 1                | 6                | 0              | 5.311235                | -1.796638 | -1.997745 |
| 2                | 6                | 0              | 4.699756                | -3.043291 | -2.066578 |
| 3                | 6                | 0              | 3.484635                | -3.263590 | -1.423319 |
| 4                | 6                | 0              | 2.859737                | -2.248241 | -0.699743 |
| 5                | 6                | 0              | 3.452159                | -0.978501 | -0.690255 |
| 6                | 6                | 0              | 4.674622                | -0.755924 | -1.328606 |
| 7                | 6                | 0              | 1.613997                | -2.450406 | 0.159930  |
| 8                | 6                | 0              | 0.745753                | -1.202395 | 0.042139  |
| 9                | 6                | 0              | 1.385345                | 0.043796  | 0.027350  |
| 10               | 7                | 0              | 2.795949                | 0.088666  | -0.041003 |
| 11               | 6                | 0              | -0.644048               | -1.225845 | 0.007006  |
| 12               | 6                | 0              | -1.385283               | -0.043843 | 0.027160  |
| 13               | 6                | 0              | -0.745709               | 1.202364  | 0.042063  |
| 14               | 6                | 0              | 0.644106                | 1.225798  | 0.007152  |
| 15               | 6                | 0              | 3.553003                | 1.004639  | 0.720572  |
| 16               | 6                | 0              | 4.807372                | 1.416502  | 0.252563  |
| 17               | 16               | 0              | 5.355338                | 0.884047  | -1.350277 |
| 18               | 6                | 0              | 3.102118                | 1.472149  | 1.959162  |
| 19               | 6                | 0              | 3.873672                | 2.363624  | 2.695585  |
| 20               | 6                | 0              | 5.120365                | 2.770458  | 2.227690  |
| 21               | 6                | 0              | 5.591223                | 2.280192  | 1.013652  |
| 22               | 6                | 0              | 2.075224                | -2.562172 | 1.632749  |
| 23               | 6                | 0              | 0.853245                | -3.723784 | -0.208648 |
| 24               | 7                | 0              | -2.795885               | -0.088824 | -0.041301 |
| 25               | 6                | 0              | -3.452171               | 0.978417  | -0.690358 |
| 26               | 6                | 0              | -2.859800               | 2.248179  | -0.699770 |
| 27               | 6                | 0              | -1.613944               | 2.450424  | 0.159726  |
| 28               | 6                | 0              | -4.674718               | 0.755867  | -1.328555 |
| 29               | 6                | 0              | -5.311510               | 1.796634  | -1.997449 |
| 30               | 6                | 0              | -4.700159               | 3.043351  | -2.066123 |

|    |    |   |           |           |           |
|----|----|---|-----------|-----------|-----------|
| 31 | 6  | 0 | -3.484950 | 3.263613  | -1.423012 |
| 32 | 6  | 0 | -3.552879 | -1.004676 | 0.720491  |
| 33 | 6  | 0 | -4.807306 | -1.416537 | 0.252599  |
| 34 | 16 | 0 | -5.355371 | -0.884128 | -1.350227 |
| 35 | 6  | 0 | -3.101937 | -1.472134 | 1.959065  |
| 36 | 6  | 0 | -3.873490 | -2.363539 | 2.695593  |
| 37 | 6  | 0 | -5.120221 | -2.770363 | 2.227824  |
| 38 | 6  | 0 | -5.591140 | -2.280147 | 1.013775  |
| 39 | 6  | 0 | -0.853266 | 3.723755  | -0.209233 |
| 40 | 6  | 0 | -2.075025 | 2.562440  | 1.632563  |
| 41 | 1  | 0 | 6.269117  | -1.617838 | -2.476443 |
| 42 | 1  | 0 | 5.178370  | -3.850500 | -2.611327 |
| 43 | 1  | 0 | 3.031465  | -4.247524 | -1.475221 |
| 44 | 1  | 0 | -1.180873 | -2.167717 | -0.031392 |
| 45 | 1  | 0 | 1.180986  | 2.167633  | -0.031163 |
| 46 | 1  | 0 | 2.138308  | 1.137581  | 2.330453  |
| 47 | 1  | 0 | 3.502964  | 2.727166  | 3.648735  |
| 48 | 1  | 0 | 5.728248  | 3.457523  | 2.806824  |
| 49 | 1  | 0 | 6.567933  | 2.573398  | 0.640406  |
| 50 | 1  | 0 | 1.205142  | -2.674541 | 2.289024  |
| 51 | 1  | 0 | 2.629690  | -1.670413 | 1.942153  |
| 52 | 1  | 0 | 2.728208  | -3.432572 | 1.756641  |
| 53 | 1  | 0 | -0.011340 | -3.854480 | 0.448139  |
| 54 | 1  | 0 | 1.489542  | -4.602216 | -0.070568 |
| 55 | 1  | 0 | 0.504742  | -3.701678 | -1.246119 |
| 56 | 1  | 0 | -6.269449 | 1.617817  | -2.476025 |
| 57 | 1  | 0 | -5.178913 | 3.850642  | -2.610627 |
| 58 | 1  | 0 | -3.031939 | 4.247628  | -1.474748 |
| 59 | 1  | 0 | -2.138090 | -1.137616 | 2.330301  |
| 60 | 1  | 0 | -3.502703 | -2.727026 | 3.648735  |
| 61 | 1  | 0 | -5.728093 | -3.457373 | 2.807032  |
| 62 | 1  | 0 | -6.567888 | -2.573337 | 0.640616  |
| 63 | 1  | 0 | -1.489787 | 4.602156  | -0.071991 |
| 64 | 1  | 0 | -0.504232 | 3.701064  | -1.246508 |
| 65 | 1  | 0 | 0.010939  | 3.855104  | 0.447914  |
| 66 | 1  | 0 | -2.728223 | 3.432692  | 1.756332  |
| 67 | 1  | 0 | -1.204900 | 2.675164  | 2.288718  |
| 68 | 1  | 0 | -2.629216 | 1.670588  | 1.942208  |

-----

Cartesian Coordinates of *meso*-4<sup>+</sup> Optimized at the UM06-2X/6-31G(d) Level of Theory

| Center<br>Number | Atomic<br>Number | Atomic<br>Type | Coordinates (Angstroms) |           |           |
|------------------|------------------|----------------|-------------------------|-----------|-----------|
|                  |                  |                | X                       | Y         | Z         |
| 1                | 6                | 0              | 0.652349                | -1.185100 | -0.339032 |
| 2                | 6                | 0              | -0.714179               | -1.139257 | -0.476265 |
| 3                | 6                | 0              | -1.382302               | 0.063101  | -0.117565 |
| 4                | 6                | 0              | -0.652350               | 1.185099  | 0.339033  |
| 5                | 6                | 0              | 0.714179                | 1.139257  | 0.476266  |
| 6                | 6                | 0              | 1.382301                | -0.063102 | 0.117567  |
| 7                | 7                | 0              | 2.757723                | -0.089429 | 0.159975  |
| 8                | 7                | 0              | -2.757723               | 0.089429  | -0.159972 |
| 9                | 6                | 0              | 3.464483                | 1.131343  | -0.010716 |
| 10               | 6                | 0              | 4.703669                | 1.128047  | -0.658002 |
| 11               | 16               | 0              | 5.396397                | -0.352552 | -1.324535 |

|    |    |   |           |           |           |
|----|----|---|-----------|-----------|-----------|
| 12 | 6  | 0 | 4.712571  | -1.516508 | -0.191926 |
| 13 | 6  | 0 | 3.473911  | -1.288215 | 0.418897  |
| 14 | 6  | 0 | -3.464485 | -1.131344 | 0.010715  |
| 15 | 6  | 0 | -4.703671 | -1.128048 | 0.657999  |
| 16 | 16 | 0 | -5.396397 | 0.352551  | 1.324536  |
| 17 | 6  | 0 | -4.712571 | 1.516508  | 0.191928  |
| 18 | 6  | 0 | -3.473910 | 1.288215  | -0.418894 |
| 19 | 6  | 0 | 5.405557  | -2.697821 | 0.077811  |
| 20 | 6  | 0 | 4.874049  | -3.639071 | 0.949071  |
| 21 | 6  | 0 | 3.658584  | -3.392231 | 1.589294  |
| 22 | 6  | 0 | 2.967974  | -2.217132 | 1.337374  |
| 23 | 6  | 0 | 2.862959  | 2.327142  | 0.405891  |
| 24 | 6  | 0 | 3.533789  | 3.520512  | 0.160129  |
| 25 | 6  | 0 | 4.778214  | 3.525323  | -0.469238 |
| 26 | 6  | 0 | 5.367216  | 2.336141  | -0.872024 |
| 27 | 6  | 0 | -2.862961 | -2.327142 | -0.405895 |
| 28 | 6  | 0 | -3.533792 | -3.520512 | -0.160136 |
| 29 | 6  | 0 | -4.778218 | -3.525323 | 0.469229  |
| 30 | 6  | 0 | -5.367220 | -2.336142 | 0.872017  |
| 31 | 6  | 0 | -5.405556 | 2.697822  | -0.077808 |
| 32 | 6  | 0 | -4.874045 | 3.639073  | -0.949066 |
| 33 | 6  | 0 | -3.658579 | 3.392234  | -1.589286 |
| 34 | 6  | 0 | -2.967970 | 2.217133  | -1.337367 |
| 35 | 6  | 0 | 1.535582  | 2.231628  | 1.148350  |
| 36 | 6  | 0 | -1.535583 | -2.231628 | -1.148351 |
| 37 | 6  | 0 | 0.793821  | 3.567457  | 1.191158  |
| 38 | 6  | 0 | 1.826969  | 1.780117  | 2.601609  |
| 39 | 6  | 0 | -1.826966 | -1.780117 | -2.601612 |
| 40 | 6  | 0 | -0.793822 | -3.567458 | -1.191158 |
| 41 | 1  | 0 | 1.204358  | -2.065912 | -0.644929 |
| 42 | 1  | 0 | -1.204358 | 2.065911  | 0.644929  |
| 43 | 1  | 0 | 6.369409  | -2.864327 | -0.392973 |
| 44 | 1  | 0 | 5.421220  | -4.553567 | 1.150931  |
| 45 | 1  | 0 | 3.259749  | -4.106424 | 2.301246  |
| 46 | 1  | 0 | 2.036823  | -2.002319 | 1.852782  |
| 47 | 1  | 0 | 3.092193  | 4.462790  | 0.462610  |
| 48 | 1  | 0 | 5.290263  | 4.465563  | -0.643272 |
| 49 | 1  | 0 | 6.336157  | 2.333620  | -1.361113 |
| 50 | 1  | 0 | -3.092196 | -4.462790 | -0.462619 |
| 51 | 1  | 0 | -5.290268 | -4.465563 | 0.643260  |
| 52 | 1  | 0 | -6.336161 | -2.333621 | 1.361105  |
| 53 | 1  | 0 | -6.369408 | 2.864328  | 0.392974  |
| 54 | 1  | 0 | -5.421215 | 4.553569  | -1.150925 |
| 55 | 1  | 0 | -3.259742 | 4.106428  | -2.301236 |
| 56 | 1  | 0 | -2.036818 | 2.002321  | -1.852773 |
| 57 | 1  | 0 | 1.397706  | 4.321224  | 1.701553  |
| 58 | 1  | 0 | 0.552953  | 3.931588  | 0.187295  |
| 59 | 1  | 0 | -0.131615 | 3.474854  | 1.765669  |
| 60 | 1  | 0 | 2.439750  | 2.534096  | 3.104462  |
| 61 | 1  | 0 | 0.888529  | 1.661972  | 3.152360  |
| 62 | 1  | 0 | 2.368466  | 0.829148  | 2.628576  |
| 63 | 1  | 0 | -2.439746 | -2.534096 | -3.104465 |
| 64 | 1  | 0 | -2.368462 | -0.829148 | -2.628580 |
| 65 | 1  | 0 | -0.888524 | -1.661974 | -3.152360 |
| 66 | 1  | 0 | -1.397707 | -4.321224 | -1.701554 |
| 67 | 1  | 0 | 0.131615  | -3.474855 | -1.765667 |
| 68 | 1  | 0 | -0.552956 | -3.931588 | -0.187295 |

-----  
 Cartesian Coordinates of **TPPD** Optimized at the M06-2X/6-31G(d) Level of Theory  
 -----

| Center<br>Number | Atomic<br>Number | Atomic<br>Type | Coordinates (Angstroms) |           |           |
|------------------|------------------|----------------|-------------------------|-----------|-----------|
|                  |                  |                | X                       | Y         | Z         |
| 1                | 7                | 0              | -2.823702               | 0.000121  | 0.001277  |
| 2                | 6                | 0              | -3.529843               | 1.226199  | -0.026775 |
| 3                | 6                | 0              | -3.529015               | -1.226650 | 0.028029  |
| 4                | 6                | 0              | 0.694209                | -0.887441 | 0.811727  |
| 5                | 6                | 0              | -3.065738               | 2.329021  | 0.699118  |
| 6                | 6                | 0              | -1.407228               | 0.000237  | 0.000180  |
| 7                | 6                | 0              | -4.700425               | 1.352384  | -0.784160 |
| 8                | 6                | 0              | -0.693546               | -0.886849 | 0.812847  |
| 9                | 6                | 0              | -3.065530               | -2.327528 | -0.701025 |
| 10               | 6                | 0              | -5.394804               | 2.556154  | -0.802950 |
| 11               | 6                | 0              | -4.698174               | -1.355056 | 0.787191  |
| 12               | 6                | 0              | -5.391576               | -2.559424 | 0.805323  |
| 13               | 6                | 0              | -3.756873               | -3.533193 | -0.661601 |
| 14               | 6                | 0              | -4.925150               | -3.657328 | 0.086045  |
| 15               | 6                | 0              | -4.928011               | 3.655902  | -0.086634 |
| 16               | 6                | 0              | -3.758060               | 3.534162  | 0.658764  |
| 17               | 7                | 0              | 2.823793                | -0.000307 | -0.002516 |
| 18               | 6                | 0              | 3.530165                | -1.226178 | 0.024074  |
| 19               | 6                | 0              | 3.528718                | 1.226734  | -0.026362 |
| 20               | 6                | 0              | -0.694151               | 0.886793  | -0.813675 |
| 21               | 6                | 0              | 3.065725                | -2.328563 | -0.702304 |
| 22               | 6                | 0              | 1.407267                | -0.000801 | -0.001966 |
| 23               | 6                | 0              | 4.701241                | -1.352725 | 0.780590  |
| 24               | 6                | 0              | 0.693613                | 0.886173  | -0.814781 |
| 25               | 6                | 0              | 3.063505                | 2.326376  | 0.703448  |
| 26               | 6                | 0              | 5.395708                | -2.556458 | 0.798144  |
| 27               | 6                | 0              | 4.699486                | 1.356498  | -0.782846 |
| 28               | 6                | 0              | 5.392647                | 2.561053  | -0.797717 |
| 29               | 6                | 0              | 3.754630                | 3.532257  | 0.667258  |
| 30               | 6                | 0              | 4.924424                | 3.657782  | -0.077789 |
| 31               | 6                | 0              | 4.928557                | -3.655810 | 0.081455  |
| 32               | 6                | 0              | 3.758117                | -3.533689 | -0.663120 |
| 33               | 1                | 0              | 1.237894                | -1.573173 | 1.454566  |
| 34               | 1                | 0              | -2.160289               | 2.233085  | 1.290494  |
| 35               | 1                | 0              | -5.058448               | 0.499832  | -1.352994 |
| 36               | 1                | 0              | -1.236858               | -1.572307 | 1.456320  |
| 37               | 1                | 0              | -2.161615               | -2.229534 | -1.294410 |
| 38               | 1                | 0              | -6.302101               | 2.635800  | -1.394369 |
| 39               | 1                | 0              | -5.055431               | -0.503867 | 1.358553  |
| 40               | 1                | 0              | -6.297226               | -2.641168 | 1.398970  |
| 41               | 1                | 0              | -3.384004               | -4.377948 | -1.233252 |
| 42               | 1                | 0              | -5.465689               | -4.597917 | 0.107956  |
| 43               | 1                | 0              | -5.469520               | 4.595930  | -0.109241 |
| 44               | 1                | 0              | -3.384618               | 4.380282  | 1.228032  |
| 45               | 1                | 0              | -1.237820               | 1.572780  | -1.456251 |
| 46               | 1                | 0              | 2.159882                | -2.232281 | -1.293028 |
| 47               | 1                | 0              | 5.059545                | -0.500523 | 1.349778  |
| 48               | 1                | 0              | 1.236980                | 1.571880  | -1.457954 |
| 49               | 1                | 0              | 2.158401                | 2.227212  | 1.294830  |

|    |   |   |          |           |           |
|----|---|---|----------|-----------|-----------|
| 50 | 1 | 0 | 6.303407 | -2.636401 | 1.388912  |
| 51 | 1 | 0 | 5.058259 | 0.506167  | -1.354540 |
| 52 | 1 | 0 | 6.299582 | 2.643889  | -1.389253 |
| 53 | 1 | 0 | 3.380362 | 4.376070  | 1.239384  |
| 54 | 1 | 0 | 5.464781 | 4.598531  | -0.097170 |
| 55 | 1 | 0 | 5.470199 | -4.595780 | 0.103134  |
| 56 | 1 | 0 | 3.384362 | -4.379448 | -1.232724 |

-----

Cartesian Coordinates of **TPPD<sup>+</sup>** Optimized at the UM06-2X/6-31G(d) Level of Theory

-----

| Center<br>Number | Atomic<br>Number | Atomic<br>Type | Coordinates (Angstroms) |           |           |
|------------------|------------------|----------------|-------------------------|-----------|-----------|
|                  |                  |                | X                       | Y         | Z         |
| 1                | 7                | 0              | -2.782890               | 0.000049  | 0.000080  |
| 2                | 6                | 0              | -3.529154               | 1.220376  | -0.051507 |
| 3                | 6                | 0              | -3.529128               | -1.220335 | 0.051554  |
| 4                | 6                | 0              | 0.683995                | -1.115816 | 0.494323  |
| 5                | 6                | 0              | -3.228788               | 2.258253  | 0.832970  |
| 6                | 6                | 0              | -1.416817               | 0.000030  | 0.000019  |
| 7                | 6                | 0              | -4.578516               | 1.339454  | -0.964027 |
| 8                | 6                | 0              | -0.683991               | -1.115784 | 0.494321  |
| 9                | 6                | 0              | -3.229261               | -2.257835 | -0.833499 |
| 10               | 6                | 0              | -5.318570               | 2.515077  | -0.999179 |
| 11               | 6                | 0              | -4.577973               | -1.339731 | 0.964633  |
| 12               | 6                | 0              | -5.318044               | -2.515338 | 0.999724  |
| 13               | 6                | 0              | -3.976548               | -3.429650 | -0.787852 |
| 14               | 6                | 0              | -5.019000               | -3.560774 | 0.127364  |
| 15               | 6                | 0              | -5.019006               | 3.560861  | -0.127432 |
| 16               | 6                | 0              | -3.976045               | 3.430063  | 0.787266  |
| 17               | 7                | 0              | 2.782917                | -0.000052 | -0.000060 |
| 18               | 6                | 0              | 3.529174                | -1.220376 | 0.051642  |
| 19               | 6                | 0              | 3.529139                | 1.220333  | -0.051679 |
| 20               | 6                | 0              | -0.683959               | 1.115817  | -0.494275 |
| 21               | 6                | 0              | 3.228766                | -2.258355 | -0.832700 |
| 22               | 6                | 0              | 1.416847                | -0.000035 | 0.000014  |
| 23               | 6                | 0              | 4.578550                | -1.339366 | 0.964158  |
| 24               | 6                | 0              | 0.684028                | 1.115778  | -0.494286 |
| 25               | 6                | 0              | 3.229190                | 2.257976  | 0.833178  |
| 26               | 6                | 0              | 5.318587                | -2.514996 | 0.999435  |
| 27               | 6                | 0              | 4.578027                | 1.339603  | -0.964725 |
| 28               | 6                | 0              | 5.318074                | 2.515220  | -0.999970 |
| 29               | 6                | 0              | 3.976457                | 3.429800  | 0.787378  |
| 30               | 6                | 0              | 5.018958                | 3.560794  | -0.127799 |
| 31               | 6                | 0              | 5.018989                | -3.560877 | 0.127813  |
| 32               | 6                | 0              | 3.976009                | -3.430169 | -0.786875 |
| 33               | 1                | 0              | 1.219896                | -1.955555 | 0.921939  |
| 34               | 1                | 0              | -2.429194               | 2.134324  | 1.557453  |
| 35               | 1                | 0              | -4.802347               | 0.517263  | -1.636809 |
| 36               | 1                | 0              | -1.219938               | -1.955485 | 0.921959  |
| 37               | 1                | 0              | -2.430044               | -2.133650 | -1.558354 |
| 38               | 1                | 0              | -6.129953               | 2.615208  | -1.712231 |
| 39               | 1                | 0              | -4.801337               | -0.517793 | 1.637887  |
| 40               | 1                | 0              | -6.128989               | -2.615782 | 1.713225  |
| 41               | 1                | 0              | -3.752926               | -4.235139 | -1.479431 |
| 42               | 1                | 0              | -5.603176               | -4.474438 | 0.155880  |

|    |   |   |           |           |           |
|----|---|---|-----------|-----------|-----------|
| 43 | 1 | 0 | -5.603170 | 4.474531  | -0.155999 |
| 44 | 1 | 0 | -3.751977 | 4.235833  | 1.478371  |
| 45 | 1 | 0 | -1.219854 | 1.955559  | -0.921890 |
| 46 | 1 | 0 | 2.429153  | -2.134500 | -1.557174 |
| 47 | 1 | 0 | 4.802403  | -0.517102 | 1.636844  |
| 48 | 1 | 0 | 1.219981  | 1.955483  | -0.921910 |
| 49 | 1 | 0 | 2.429929  | 2.133897  | 1.558003  |
| 50 | 1 | 0 | 6.129981  | -2.615057 | 1.712484  |
| 51 | 1 | 0 | 4.801441  | 0.517562  | -1.637837 |
| 52 | 1 | 0 | 6.129053  | 2.615565  | -1.713446 |
| 53 | 1 | 0 | 3.752777  | 4.235400  | 1.478809  |
| 54 | 1 | 0 | 5.603116  | 4.474466  | -0.156435 |
| 55 | 1 | 0 | 5.603138  | -4.474552 | 0.156479  |
| 56 | 1 | 0 | 3.751912  | -4.236017 | -1.477880 |

---



## 6. References

1. Frisch, M. J.; Trucks, G. W.; Schlegel, H. B.; Scuseria, G. E.; Robb, M. A.; Cheeseman, J. R.; Scalmani, G.; Barone, V.; Mennucci, B.; Petersson, G. A.; Nakatsuji, H.; Caricato, M.; Li, X.; Hratchian, H. P.; Izmaylov, A. F.; Bloino, J.; Zheng, G.; Sonnenberg, J. L.; Hada, M.; Ehara, M.; Toyota, K.; Fukuda, R.; Hasegawa, J.; Ishida, M.; Nakajima, T.; Honda, Y.; Kitao, O.; Nakai, H.; Vreven, T.; Montgomery, J. A., Jr.; Peralta, J. E.; Ogliaro, F.; Bearpark, M.; Heyd, J. J.; Brothers, E.; Kudin, K. N.; Staroverov, V. N.; Kobayashi, R.; Normand, J.; Raghavachari, K.; Rendell, A.; Burant, J. C.; Iyengar, S. S.; Tomasi, J.; Cossi, M.; Rega, N.; Millam, J. M.; Klene, M.; Knox, J. E.; Cross, J. B.; Bakken, V.; Adamo, C.; Jaramillo, J.; Gomperts, R.; Stratmann, R. E.; Yazyev, O.; Austin, A. J.; Cammi, R.; Pomelli, C.; Ochterski, J. W.; Martin, R. L.; Morokuma, K.; Zakrzewski, V. G.; Voth, G. A.; Salvador, P.; Dannenberg, J. J.; Dapprich, S.; Daniels, A. D.; Farkas, Ö.; Foresman, J. B.; Ortiz, J. V.; Cioslowski, J.; Fox, D. J. *Gaussian 09*; Revision D.01; Gaussian Inc.: Wallingford CT, 2009.
2. CrysAlisPro; Rigaku OD, The Woodlands, TX, 2015.
3. Dolomanov, O. V.; Bourhis, L. J.; Gildea, R. J.; Howard, J. A. K.; Puschmann, H. *J. Appl. Cryst.* **2009**, *42*, 339.
4. Sheldrick, G. M. *Acta Crystallogr., Sect. A* **2015**, *71*, 3.
5. Sheldrick, G. M. *Acta Crystallogr., Sect. C* **2015**, *71*, 3.
6. Kato, S.-i.; Matsuoka, T.; Suzuki, S.; Asano, M. S.; Yoshihara, T.; Tobita, S.; Matsumoto, T.; Kitamura, C. *Org. Lett.* **2020**, *22*, 734.
7. Kataoka, S.; Suzuki, S.; Shiota, Y.; Yoshizawa, K.; Matsumoto, T.; Asano, M. S.; Yoshihara, T.; Kitamura, C.; Kato, S.-i. *J. Org. Chem.* **2021**, *86*, 12559.
8. Sun, D.; Rosokha, S. V.; Kochi, J. K. *J. Am. Chem. Soc.* **2004**, *126*, 1388.
9. Szeghalmi, A. V.; Erdmann, M.; Engel, V.; Schmitt, M.; Amthor, S.; Kriegisch, V.; Nöll, G.; Stahl, R.; Lambert, C.; Leusser, D.; Stalke, D.; Zabel, M.; Popp, J. *J. Am. Chem. Soc.* **2004**, *126*, 7834.
10. K. Yamaguchi, T. Kawakami, Y. Takano, Y. Kitagawa, Y. Yamashita, H. Fujita, *Int. J. Quantum Chem.*, **2002**, *90*, 370.

## 7. Author contributions

S.-i. Kato and C. Kitamura conceived and designed the projects; K. Harada synthesized the compounds and contributed on most of the experimental work; C. Hasegawa and M. Hasegawa performed the optical resolution and the UV–vis and CD spectroscopic measurements; K. Harada and S. Higashibayashi performed the kinetic study; K. Harada and H. Sugishita performed the electrochemical measurements; S.-i. Kato and S. Higashibayashi performed the theoretical calculations; T. Matsumoto performed the single-crystal X-ray diffraction analyses; S. Suzuki performed the EPR spectroscopic measurements; S.-i. Kato, S. Higashibayashi, M. Hasegawa, and S. Suzuki wrote the manuscript; S.-i. Kato played a critical role in the discussion of the experimental design, project direction, experiments and results, and preparation of the manuscript; All authors discussed the results and commented on the manuscript.
